# Supplementary material for: Genetic polymorphisms in the IFNL4, MxA, and MxB genes were associated with biochemical index of chronic HBV patients from Yunnan, China
Source: PeerJ. 2022 Apr 28;10:e13353. doi: 10.7717/peerj.13353 (PMC9057288; doi:10.7717/peerj.13353)
Supplement: Supplemental Information 1 [file peerj-10-13353-s001.xlsx]

## Sheet: Sheet1
AST	ALT	TBIL	DBIL	IBIL	TP	ALB	GLOB	GLU	BUN	CREA	UA	WBC	NEUT	LYM	MONO	EO	BASO
34	56	5.0	2.0	3.0	72	35	37	4.0	5.0	65.0	263	5.01	3.07	1.39	0.31	0.21	0.03
27	43	11.0	3.3	7.7	71	45	26	4.2	4.0	69.0	559	8.21	5.69	1.86	0.56	0.09	0.01
14	＜6	7.7	3.6	4.1	65	39	26	4.3	4.1	51.0	279	5.05	2.39	2.01	0.41	0.21	0.03
23	13	9.8	4.5	5.3	68	35	33	4.0	5.2	56.0	264	4.74	2.34	1.56	0.53	0.28	0.03
26	27	11.5	4.4	7.1	77	46	31	4.3	3.9	103.0	544	9.25	7.39	1.30	0.42	0.08	0.06
39	29	24.8	9.3	15.5	74	34	40	4.1	2.8	47.0	250	4.23	1.04	2.54	0.44	0.16	0.05
26	38	19.1	5.2	13.9	78	45	33	7.0	3.6	46.0	329	7.60	4.25	2.82	0.36	0.12	0.05
22	24	14.3	4.6	9.7	72	44	28	4.3	5.1	90.0	410	7.22	3.08	3.69	0.33	0.09	0.03
16	7	7.1	2.6	4.5	78	37	41	3.2	6.0	45.0	202	7.00	4.72	1.89	0.37	0.01	0.01
21	11	10.6	2.8	7.8	78	46	32	4.3	8.7	197.0	496	5.28	3.41	1.10	0.63	0.12	0.02
11	15	15.4	5.1	10.3	76	46	30		4.7	83.0	537	5.40	3.87	1.21	0.27	0.02	0.03
19	15	9.1	3.4	5.7	78	45	33	5.0	4.0	51.0	339	4.32	2.61	1.49	0.18	0.03	0.01
122	71	28.8	13.0	15.8	75	38	37	5.2	5.7	67.0	313	3.75	2.44	0.77	0.38	0.13	0.03
22	23	6.7	2.4	4.3	77	42	35	4.9	3.2	84.0	374	12.21	9.20	2.20	0.57	0.22	0.02
29	37	9.5	4.4	5.1	79	30	49	4.6	2.7	49.0	290	7.73	5.74	1.14	0.60	0.23	0.02
18	11	7.7	2.3	5.4	71	40	31	4.9	5.2	67.0	365	6.5	3.27	2.33	0.40	0.23	0.02
20	25	14.9	5.5	9.4	69	40	29	3.8	4.7	62.0	448	6.89	3.99	2.40	0.39	0.09	0.02
23	51	12.3	6.8	5.5	41	18	23	20.7	7.3	66.0	331	5.16	4.08	0.37	0.71	0.00	0.00
54	175	12.5	5.0	7.5	73	38	35	4.4	3.8	46.0	298	14.28	12.47	1.54	0.23	0.03	0.01
48	170	13.8	7.6	6.2	71	42	29	3.5	1.9	52.0	270	5.62	2.58	1.56	0.18	1.13	0.17
18	27	8.0	3.4	4.6	71	41	30	4.3	4.7	100.0	464	6.53	3.46	2.39	0.42	0.22	0.04
22	54	12.1	3.7	8.5	72	48	24	9.9	5.0	68.0	369	5.25	3.18	1.53	0.36	0.14	0.04
43	104	79.8	58.5	21.3	75	44	31	6.3	4.3	71.0	485	4.09	2.80	1.08	0.15	0.19	0.03
29	45	11.2	4.3	6.9	73	39	34	4.3	6.5	66.0	315	5.15	2.91	1.50	0.55	0.14	0.05
23	25	5.6	2.0	3.6	65	33	32	3.8	5.2	81.0	343	3.53	1.79	1.17	0.34	0.21	0.02
23	18	16.3	5.5	10.8	76	44	32	4.7	5.4	57.0	301	6.31	3.33	1.92	0.31	0.71	0.04
14	13	5.0	2.0	3.0	73	42	31	5.5	5.1	59.0	236	7.90	5.04	2.21	0.51	0.10	0.04
13	11	9.6	2.5	7.1	75	39	36	4.3	4.5	48.0	355	6.46	3.91	1.91	0.37	0.26	0.01
22	17	6.1	1.8	4.3	84	49	35	4.3	6.4	39.0	292	5.86	3.86	1.62	0.34	0.08	0.02
20	13	14.0	4.9	9.1	81	45	36	4.2	3.1	40.0	214	7.03	4.97	1.66	0.39	0.01	0.00
25	21	11.2	4.9	6.3	92	43	49	4.2	4.0	133.0	191	8.88	6.98	1.20	0.63	0.06	0.01
15	18	14.8	4.7	10.1	77	44	33	3.6	4.2	59.0	358	4.56	2.67	1.65	0.20	0.03	0.01
176	273	21.5	8.6	12.9	82	41	41	4.3	3.5	58.0	374	6.19	2.62	2.93	0.47	0.11	0.06
172	183	37.8	24.7	13.1	65	25	40	6.7	3.7	44.0	262	7.45	3.84	2.85	0.51	0.22	0.03
24	31	12.2	3.6	8.6	79	46	33	5.0	3.5	77.0	491	6.44	3.67	2.13	0.50	0.11	0.03
26	37	10.9	3.9	7.0	75	43	32	4.3	3.3	76.0	302	5.99	3.68	1.71	0.37	0.20	0.03
13	7	5.8	2.6	3.2	85	40	45	3.9	2.4	40.0	243	8.95	6.00	2.22	0.69	0.03	0.01
23	45	4.6	1.3	3.3	74	43	31		10.3	273.0	551	9.17	6.47	1.92	0.42	0.30	0.06
16	10	3.5	1.0	2.5	78	47	31	5.0	24.9	821.0	441	6.90	4.84	1.26	0.29	0.48	0.03
31	28	15.5	3.5	12.0	88	49	39	4.2	3.6	51.0	358	5.37	3.13	1.93	0.19	0.11	0.01
17	9	6.4	2.9	3.5	67	38	29	4.3	2.5	53.0	239	4.34	2.51	1.54	0.22	0.06	0.01
128	178	18.7	10.1	8.6	63	35	28	5.2	9.7	63.0	301	6.33	3.83	1.84	0.55	0.10	0.01
112	145	11.9	4.9	7.0	63	36	27	8.1	3.3	77.0	175	5.97	4.12	1.41	0.41	0.01	0.02
26	24	13.3	4.4	8.9	81	49	32	5.8	3.4	66.0	394	14.56	12.31	1.61	0.56	0.04	0.04
									5.7	74.0	410	3.59	1.60	1.50	0.22	0.24	0.03
									2.7	62.0	113	18.82	15.56	1.99	1.05	0.19	0.03
20	25	9.3	3.4	5.9	77	47	30	5.4	3.6	76.0	349	8.07	5.87	1.56	0.53	0.09	0.02
23	20	5.5	2.0	3.5	49	28	21	4.4	4.5	48.0	207	6.96	6.17	0.65	0.12	0.01	0.01
55	92	9.4	2.6	6.8	74	45	29	5.9	3.3	50.0	482	5.56	3.37	1.72	0.44	0.00	0.03
37	48	26.2	7.2	19.0	75	44	31	5.1	4.9	84.0	435	8.63	4.28	3.65	0.40	0.28	0.02
36	61	8.0	2.5	5.5	79	47	32	3.8	3.1	43.0	470	6.39	3.87	2.07	0.36	0.04	0.05
23	25	10.1	3.5	6.6	80	41	39	4.7	4.6	41.0	262	7.46	4.46	2.23	0.56	0.20	0.01
16	13	9.0	3.2	5.8	81	46	35	5.3	3.9	60.0	344	3.68	1.56	1.72	0.34	0.04	0.02
47	61	51.9	17.5	34.4	78	38	40	3.5	3.5	63.0	377	2.61	1.23	0.98	0.26	0.10	0.04
17	18	13.3	3.5	9.8	72	47	25	4.2	4.6	73.0	490	4.56	2.62	1.48	0.30	0.09	0.07
11	8	8.3	2.2	6.1	65	38	27	4.4	5.5	39.0	221	7.01	4.43	1.71	0.49	0.32	0.06
12	16	11.4	4.9	6.5	72	39	33	4.0	5.6	80.0	347	9.44	7.84	1.08	0.43	0.08	0.01
25	47	18.2	9.1	9.1	83	45	38	5.4	6.0	81.0	380	17.39				0.02	0.04
17	18	12.0	4.8	7.2	69	43	26	5.7	3.9	56.0	362	6.29	3.49	2.45	0.26	0.06	0.03
39	107	15.7	4.2	11.5	84	48	36	5.1	4.4	72.0	395	8.42	5.13	2.42	0.55	0.28	0.04
15	9	6.4	1.9	4.5	72	39	33	4.9	4.1	61.0	303	11.37	8.81	1.91	0.61	0.02	0.02
19	16	9.6	2.7	6.9	78	46	32	5.1	5.7	50.0	328	7.19	4.59	2.26	0.24	0.07	0.03
29	16	23.9	12.8	11.1	77	40	37	4.4	5.0	54.0	348	3.86	1.58	1.76	0.42	0.07	0.03
18	25	11.1	3.1	8.0	78	47	31	4.0	3.1	46.0	306	6.87	5.06	1.46	0.31	0.03	0.01
18	15	20.5	8.3	12.2	69	39	30	4.1	3.2	57.0	226	4.12	2.12	1.50	0.31	0.15	0.04
19	18	7.1	2.5	4.6	61	37	24	4.2	5.1	59.0	265	5.50	3.48	1.46	0.39	0.15	0.02
25	42	8.0	3.0	5.0	75	43	32	4.4	4.0	73.0	542	6.12	3.47	2.00	0.36	0.22	0.07
31	52	10.1	3.1	7.0	74	44	30	5.1	9.3	63.0	531	6.18	2.59	3.08	0.40	0.08	0.03
20	18	24.5	9.0	15.5	69	42	27	5.2	5.1	51.0	308	12.18	10.48	1.00	0.63	0.06	0.01
25	54	12.2	4.2	8.0	84	49	35	4.4	2.8	46.0	370	7.78	5.65	1.69	0.39	0.02	0.03
18	15	16.0	5.7	10.3	73	43	30	4.1	5.4	75.0	426	9.25	6.22	1.92	0.61	0.46	0.04
20	22	13.6	4.8	8.8	67	44	23	6.1	4.7	82.0	365	8.71	6.93	1.29	0.41	0.06	0.02
16	9	9.4	4.0	5.4	65	36	29	4.1	1.6	36.0	226	7.72	5.95	1.29	0.45	0.02	0.01
49	31	9.5	3.8	5.7	73	44	29	5.0	4.2	62.0	398	9.50	6.79	1.93	0.73	0.03	0.03
14	17	8.2	3.7	4.5	73	44	29	6.3	5.3	63.0	379	7.39	4.90	1.79	0.66	0.02	0.02
35	52	4.8	2.3	2.5	73	35	38	3.5	5.0	56.0	429	14.41	10.94	2.04	0.89	0.21	0.06
15	16	12.7	4.8	7.9	76	47	29	3.9	4.3	77.0	398	5.62	2.91	2.27	0.33	0.08	0.03
26	46	8.3	3.1	5.2	63	38	25	4.5	3.7	619	619	6.17	3.08	2.43	0.41	0.22	0.03
18	9	13.1	4.7	8.4	81	51	30	3.7	2.3	50.0	298	4.64	2.58	1.71	0.29	0.04	0.02
17	11	7.0	2.4	4.6	72	43	29	4.7	4.7	67.0	445	6.32	3.28	2.46	0.34	0.20	0.04
34	25	11.3	4.0	7.3	74	37	37	6.2	2.6	35.0	383	4.81	2.73	1.64	0.36	0.06	0.02
21	15	16.2	5.6	10.6	76	45	31	4.9	4.3	74.0	474	5.21	3.05	1.87	0.22	0.04	0.03
119	318	6.2	3.9	2.3	71	40	31	4.1	2.9	43.0	248	8.45	4.70	1.86	0.37	1.34	0.18
14	12	8.5	2.4	6.1	69	39	30	4.0	3.1	57.0	343	8.05	5.06	2.18	0.56	0.23	0.02
75	116	16.9	11.6	5.3	60	32	28	5.9	5.2	40.0	148	0.45	0.05	0.25	0.13	0.01	0.01
165	57	31.5	14.6	16.9	74	29	45	4.9	7.9	57.0	546	4.62	2.99	1.02	0.49	0.11	0.01
18	15	8.5	2.6	5.9	78	44	34		5.0	46.0	301	5.07	3.80	0.77	0.39	0.08	0.03
16	10	5.8	1.3	4.5	83	44	39	4.0	5.3	65.0	287	7.30	3.73	2.16	0.49	0.88	0.04
17	19	7.1	1.9	5.2	80	43	37	4.6	5.3	54.0	388	8.95	3.81	4.21	0.62	0.26	0.05
20	22	8.3	2.5	5.8	76	45	31	4.9	4.8	75.0	481	4.96	2.62	2.03	0.24	0.06	0.01
26	21	17.5	5.8	11.7	87	41	46	3.8	15.7	168.0	727	1090	8.15	2.08	0.60	0.05	0.02
40	63	15.0	5.0	10.0	78	43	35	4.2	3.7	89.0	541	6.96	4.42	2.00	0.40	0.11	0.03
14	11	12.1	3.4	8.7	73	44	29	4.5	4.0	57.0	339	5.46	2.92	2.12	0.34	0.05	0.03
41	43	17.5	5.5	12.0	76	40	36	4.1	3.1	73.0	230	6.75	3.18	2.95	0.37	0.19	0.06
16	8	5.7	1.5	4.2	82	45	37	4.4	3.2	46.0	343	4.06	2.36	1.43	0.21	0.05	0.01
45	53	12.7	4.8	7.9	77	48	29	4.5	3.9	66.0	495	5.05	2.12	2.50	0.34	0.08	0.01
23	31	13.6	4.1	9.5	75	40	35	6.2	3.2	70.0	471	6.97	4.39	2.19	0.31	0.06	0.02
37	39	9.9	3.8	6.1	71	41	30	3.5	5.2	80.0	392	5.20	2.47	2.09	0.49	0.12	0.03
98	75	17.2	7.4	9.8	73	39	34	4.3	3.1	51.0	348	7.15	5.02	0.83	1.28	0.01	0.01
28	31	15.0	4.1	10.9	81	45	36	4.7	5.2	63.0	377	5.69	3.30	2.03	0.28	0.06	0.02
23	18	18.9	5.8	13.1	80	50	30	5.2	8.1	94.0	379	4.12	2.34	1.40	0.18	0.18	0.02
21	16	22.7	7.0	15.7	75	43	32	4.5	4.7	51.0	354	4.26	2.41	1.39	0.24	0.20	0.02
38	38	11.9	4.4	7.5	79	44	35	4.5	4.4	49.0	300	5.58	3.73	0.40	0.38	0.06	0.01
								3.5				5.31	3.75	1.22	0.31	0.01	0.02
51	47	23.3	15.7	7.6	59	25	34	7.3	3.6	40.0	156	20.35	17.82	1.30	1.20	0.01	0.02
28	30	29.3	13.1	16.2	48	25	23	4.8	13.8	61.0	262	5.65	3.69	1.52	0.37	0.06	0.01
54	53	28.8	13.7	15.1	60	32	28	4.7	6.4	60.0	310	4.24	2.96	1.00	0.22	0.05	0.01
36	31	13.7	2.7	11.0	74	43	31	5.0	4.9	61.0	487	4.52	2.80	1.20	0.42	0.07	0.03
25	65	10.4	2.8	7.6	64	38	26	4.6	3.1	51.0	472	4.54	2.49	1.56	0.31	0.17	0.01
24	17	11.5	3.3	8.2	83	47	36	4.1	4.3	49.0	302	6.64	3.55	2.28	0.60	0.16	0.05
33	36	31.0	11.0	20.0	63	37	26	4.5	4.1	81.0	330	8.97	6.64	1.67	0.54	0.08	0.04
20	17	8.8	3.2	5.6	67	40	27	3.2	2.9	51.0	272	6.68	3.89	2.21	0.33	0.20	0.05
22	19	6.7	2.7	4.0	84	44	40	4.5	2.9	47.0	296	5.81	3.83	1.49	0.42	0.06	0.01
35	39	13.7	4.1	9.6	80	49	31	4.4	4.5	58.0	351	5.45	3.37	1.65	0.39	0.03	0.01
16	27	9.6	2.5	7.1	75	44	31	6.7	6.2	93.0	520	3.54	1.75	1.28	0.39	0.10	0.02
23	23	14.8	4.5	10.3	78	48	30	4.5	5.1	63.0	431	5.72	3.14	1.93	0.36	0.26	0.03
14	12	13.5	3.6	9.9	71	44	27	4.1	6.0	64.0	250	6.46	3.78	1.98	0.31	0.32	0.07
18	13	19.5	5.9	13.6	77	42	35	4.4	3.9	67.0	343	5.84	3.44	1.87	0.49	0.02	0.02
17	18	8.3	2.7	5.6	71	45	26	3.7	5.9	67.0	438	8.28	4.38	3.22	0.53	0.13	0.02
15	11	14.5	3.7	10.8	75	42	33	4.6	5.8	51.0	250	5.42	3.55	1.57	0.24	0.05	0.01
20	28	12.3	4.7	7.6	81	45	36	4.8	5.7	66.0	518	4.54	2.02	2.03	0.37	0.11	0.01
18	14	17.3	6.4	10.9	82	48	34	3.8	6.6	61.0	341	6.08	3.99	1.54	0.43	0.11	0.01
55	143	10.0	3.4	6.6	67	38	29	4.9	4.3	58.0	369	6.03	1.96	3.01	0.60	0.39	0.07
22	19	8.2	2.3	5.9	73	41	32	4.4	3.8	52.0	244	4.81	3.22	1.20	0.27	0.11	0.01
39	80	17.1	5.0	12.1	77	50	27	4.3	6.4	65.0	370	7.23	3.07	2.52	0.37	1.23	0.04
42	116	16.2	5.0	11.2	79	47	32	5.1	5.0	61.0	321	7.08	4.11	2.41	0.36	0.16	0.04
66	30	6.1	2.8	3.3	93	43	50	4.5	4.4	76.0	719	4.75	2.76	1.51	0.40	0.07	0.01
12	9	6.5	2.4	4.1	61	37	24	6.0	3.1	67.0	207	8.52	6.64	1.51	0.37	0.00	0.00
20	21	6.9	2.0	4.9	79	47	32	5.0	2.0	48.0	308	7.00	4.43	2.03	0.46	0.06	0.02
29	35	16.1	5.9	10.2	69	39	30	7.0	6.5	106.0	336	3.20	2.06	0.90	0.21	0.02	0.01
13	10	6.5	2.2	4.3	68	39	29	4.2	4.0	48.0	264	5.27	2.88	1.99	0.29	0.09	0.02
24	17	9.5	3.7	5.8	68	39	29	4.1	5.0	54.0	318	4.22	2.14	1.41	0.53	0.12	0.02
14	20	5.0	2.1	2.9	67	31	36	3.1				12.50	10.20	1.72	0.33	0.24	0.01
17	17	6.9	2.7	4.2	77	45	32	3.7	2.8	64.0	350	4.95	3.29	1.33	0.26	0.05	0.02
25	44	20.4	8.2	12.2	79	49	30	4.6	5.5	68.0	305	8.24	5.90	1.80	0.46	0.06	0.02
17	24	8.4	2.5	5.9	72	43	29	4.4	3.9	68.0	387	6.78	2.85	3.44	0.40	0.07	0.02
30	57	8.0	2.1	5.9	80	50	30	7.1	4.5	66.0	442	5.93	3.54	1.86	0.35	0.15	0.03
17	15	9.7	3.0	6.7	83	48	35	5.0	4.8	56.0	323	3.63	1.65	1.57	0.34	0.06	0.01
15	8	8.1	2.9	5.2	65	26	39	3.7	4.8	43.0	261	12.30	10.00	1.66	0.42	0.19	0.03
76	47	12.6	4.5	8.1	71	35	36	3.2	3.7	60.0	451	6.38	5.02	0.72	0.53	0.09	0.02
25	21	3.9	1.6	2.3	65	40	25	5.1	5.0	55.0	226	4.04	1.84	1.83	0.25	0.10	0.02
27	37	24.9	9.5	15.4	76	48	28	4.4	3.9	73.0	546	5.64	3.13	1.97	0.29	0.22	0.03
20	17	4.4	1.5	2.9	70	32	38	4.0	5.0	52.0	218	4.45	2.87	1.01	0.35	0.19	0.03
44	25	36.8	22.3	14.5	58	25	33	4.5	2.8	59.0	294	1.94	0.84	0.86	0.20	0.03	0.01
27	52	8.2	2.4	5.8	76	43	33	4.8	4.5	58.0	264	5.31	3.62	1.15	0.35	0.16	0.03
18	14	15.8	3.9	11.9	79	43	36	5.2	3.4	53.0	321	6.48	4.36	1.59	0.42	0.07	0.04
29	22	18.5	5.4	13.1	81	47	34	4.6	5.8	60.0	287	5.58	3.03	1.89	0.30	0.29	0.07
55	11	14.1	6.5	7.6	60	32	28	10.7	2.0	73.0	199	9.59	9.18	0.26	0.15	0.00	0.00
42	51	27.0	11.6	15.4	77	43	34	4.3	3.7	87.0	455	4.89	2.42	1.98	0.25	0.20	0.04
26	15	12.9	6.1	6.8	52	30	22	4.7	4.3	71.0	344	2.84	1.71	0.75	0.20	0.17	0.01
21	17	20.1	8.4	11.7	55	31	24	6.5	5.0	65.0	253	12.37	9.40	1.62	1.33	0.01	0.01
23	28	9.2	3.1	6.1	55	30	25	4.2	3.7	51.0	193	9.58	5.65	2.96	0.80	0.16	0.01
18	13	7.1	2.7	4.4	70	41	29	4.5	3.1	60.0	436	5.59	2.11	2.99	0.42	0.06	0.01
21	17	20.2	6.8	13.4	76	45	31	4.2	5.9	62.0	369	6.33	4.54	1.42	0.24	0.11	0.02
42	62	10.1	3.4	6.7	77	44	33	4.2	3.3	56.0	327	5.58	2.59	2.60	0.29	0.07	0.03
32	76	9.6	3.6	6.0	77	48	29	4.9	6.0	73.0	408	5.64	2.84	2.41	0.32	0.04	0.03
												6.33	4.37	1.25	0.51	0.16	0.04
18	23	7.7	3.2	4.5	70	37	33	4.2	5.5	72.0	331	15.38	10.37	3.50	1.17	0.28	0.06
21	16	7.4	2.5	4.9	73	45	28	5.3	3.5	52.0	225	13.53	7.99	4.80	0.66	0.03	0.05
15	25	11.8	4.6	7.2	67	40	27	4.7	4.7	67.0	352	8.32	4.40	2.92	0.70	0.26	0.04
61	73	5.2	2.4	2.8	64	37	27	4.7	7.5	80.0	450	4.80	2.56	1.75	0.37	0.11	0.01
28	18	10.1	6.0	4.1	75	24	51	4.1	4.0	63.0	255	15.40	11.67	2.14	1.36	0.19	0.04
17	15	27.9	9.2	18.7	63	37	26	4.3	2.8	54.0	176	6.00	3.56	1.58	0.37	0.46	0.03
11	18	9.4	2.5	6.9	66	36	30	4.1	4.0	47.0	309	10.36	3.37	6.53	0.40	0.05	0.01
17	24	13.2	3.4	9.8	70	38	32	4.5	6.4	51.0	234	9.72	7.74	1.27	0.64	0.01	0.06
17	9	9.6	3.0	6.6	83	48	35	4.5	3.5	52.0	257	10.52	7.21	2.54	0.69	0.03	0.05
12	8	5.2	2.2	3.0	67	37	30	4.7	4.0	79.0	287	7.12	5.22	1.33	0.44	0.11	0.02
26	16	16.6	5.4	11.2	66	42	24	4.8	3.3	80.0	387	9.64	7.33	1.66	0.60	0.04	0.01
40	30	19.5	5.7	13.8	76	45	31	5.0	3.1	59.0	578	6.89	4.67	1.62	0.46	0.07	0.07
25	41	14.1	4.5	9.6	81	51	30	4.5	4.0	84.0	350	5.92	3.72	1.72	0.35	0.09	0.04
22	23	10.5	3.4	7.1	76	46	30	6.9	6.4	81.0	309	10.00	9.00	0.73	0.25	0.01	0.01
124	108	176.4	143.5	32.9	71	36	35	6.0	5.4	63.0	281	11.49	10.15	0.88	0.43	0.01	0.02
24	22	12.6	4.1	8.5	74	43	31	3.8	5.1	44.0	389	5.32	3.74	1.34	0.21	0.02	0.01
18	20	6.1	2.0	4.1	74	42	32	5.1	5.4	43.0	224	7.27	4.29	2.16	0.43	0.37	0.02
22	24	6.6	1.4	5.2	44	20	24	3.9	5.5	89.0	351	6.78	2.65	2.25	0.40	1.44	0.04
20	50	11.6	4.1	7.5	78	46	32		4.2	68.0	396	14.72	12.51	1.64	0.55	0.01	0.01
												5.77	3.77	1.62	0.25	0.11	0.02
133	216	64.5	47.2	17.3	66	35	31	5.6	2.3	58.0	219	6.06	4.02	1.53	0.45	0.05	0.01
25	28	10.5	3.4	7.1	70	40	30	4.2	5.8	38.0	290	7.82	5.50	1.66	0.39	0.25	0.02
18	13	12.2	5.6	6.6	80	45	35	4.4	4.6	66.0	361	5.18	2.16	2.41	0.43	0.15	0.03
24	22	33.3	13.6	19.7	63	40	23	4.7	4.9	76.0	559	3.88	2.67	0.92	0.26	0.03	0.00
31	42	14.3	4.7	9.6	73	44	29	5.0	4.7	89.0	319	5.98	3.12	2.05	0.29	0.49	0.03
48	29	12.6	4.8	7.8	83	43	40	4.2	3.1	54.0	372	9.43	6.21	2.66	0.47	0.06	0.03
34	84	8.9	3.9	5.0	75	47	28	4.4	8.1	79.0	521	6.91	4.32	1.97	0.40	0.17	0.05
105	109	6.4	2.9	3.5	69	31	38	5.3	5.6	88.0	194	15.39	13.14	1.68	0.54	0.02	0.01
28	25	7.3	1.9	5.4	73	37	36	3.9	4.8	54.0	287	5.52	1.82	2.69	0.47	0.48	0.06
36	50	13.8	5.1	8.7	72	42	30		2.8	71.0	383	8.63	4.89	2.97	0.55	0.16	0.06
18	13	7.3	2.3	5.0	85	49	36	4.9	5.6	46.0	301	5.78	4.04	1.40	0.21	0.09	0.04
45	43	10.7	3.1	7.6	82	44	38	4.7	4.0	50.0	214	4.19	2.22	1.57	0.29	0.03	0.08
14	11	3.5	1.2	2.3	81	43	38	4.9	26.8	1128.0	710	6.21	4.03	1.25	0.54	0.35	0.04
19	24	14.4	4.9	9.5	72	44	28		5.1	69.0	334	8.57	6.40	1.54	0.57	0.03	0.03
15	17	6.5	2.4	4.1	63	37	26	4.6	5.3	73.0	515	8.59	4.64	2.78	0.59	0.52	0.06
32	69	13.1	5.1	8.0	80	45	35	4.5	3.9	57.0	442	4.50	2.87	1.12	0.19	0.31	0.01
14	11	7.1	2.7	4.4	81	48	33	6.1	1.9	51.0	222	8.15	6.88	0.79	0.47	0.00	0.01
14	16	11.5	3.2	8.3	70	42	28	4.5	4.9	98.0	316	6.45	3.51	2.08	0.39	0.41	0.09
57	55	11.4	4.9	6.5	74	39	35	5.0	3.2	55.0	442	3.45	1.30	1.70	0.22	0.21	0.02
24	32	4.6	1.9	2.7	68	43	25	4.5	6.5	71.0	313	6.04	4.42	1.20	0.39	0.02	0.01
22	10	12.9	4.0	8.9	73	40	33	9.9	6.7	83.0	376	12.43	10.13	1.46	0.42	0.40	0.02
14	12	8.7	2.9	5.8	74	40	34	4.5	5.3	53.0	310	5.61	2.41	2.60	0.52	0.04	0.04
15	16	9.5	3.3	6.2	62	36	26	4.7	3.5	54.0	285	4.05	1.90	1.81	0.26	0.07	0.01
29	36	8.8	3.1	5.7	76	46	30	4.8	4.6	73.0	475	5.64	3.37	1.68	0.22	0.32	0.05
24	37	10.5	3.9	6.6	77	50	27	4.5	3.4	76.0	418	4.95	2.57	1.86	0.40	0.10	0.02
32	19	6.9	2.4	4.5	78	31	47	6.7	6.1	31.0	364	7.23	6.00	0.78	0.38	0.05	0.02
19	29	8.5	2.1	6.4	82	45	37	5.1	3.3	45.0	350	7.98	4.45	2.80	0.61	0.08	0.04
17	18	5.0	1.3	3.7	75	41	34	4.1	4.4	52.0	314	6.71	5.00	1.14	0.38	0.11	0.08
14	23	5.0	1.5	3.5	69	39	30	4.8	7.4	79.0	353	9.08	6.66	1.89	0.41	0.09	0.03
27	44	15.1	4.7	10.4	80	46	34	4.7	5.2	99.0	407	4.46	2.16	1.98	0.28	0.04	0.00
28	36	13.4	5.0	8.4	81	36	45	4.5	7.7	65.0	294	11.49	8.88	0.56	0.80	0.23	0.02
23	17	4.3	1.2	3.1	72	36	36	5.0	3.2	56.0	392	7.51	3.98	2.69	0.28	0.48	0.08
15	28	26.8	11.0	15.8	79	45	34	5.0	3.9	93.0	464	12.77	10.06	1.75	0.85	0.09	0.02
18	21	4.9	1.7	3.2	81	40	41	7.2	5.4	100.0	399	6.68	2.94	2.83	0.57	0.30	0.04
73	104	12.5	4.1	8.4	82	47	35	4.3	3.7	40.0	318	4.35	2.32	1.68	0.30	0.04	0.01
39	42	7.8	2.8	5.0	69	35	34	7.8	3.7	83.0	425	6.69	4.75	1.51	0.31	0.10	0.02
13	17	29.0	9.4	19.6	68	40	28	5.3	3.1	56.0	202	5.54	3.35	1.72	0.36	0.09	0.02
18	32	9.1	2.9	6.2	71	39	32	5.0	4.9	51.0	489	5.93	3.21	2.36	0.25	0.09	0.02
46	38	21.6	7.5	14.1	73	40	33	4.2	6.1	82.0	394	5.60	2.72	2.34	0.40	0.12	0.02
25	38	18.8	6.8	12.0	75	45	30	4.3	5.0	82.0	398	4.47	2.67	1.40	0.30	0.07	0.03
24	32	5.5	1.9	3.6	64	36	28	4.5	6.7	71.0	306	5.03	2.08	2.24	0.43	0.24	0.04
21	15	26.1	8.0	18.1	82	48	34	4.2	3.1	65.0	287	8.18	6.03	1.74	0.35	0.02	0.04
22	19	8.6	2.7	5.9	72	41	31	4.1	3.1	61.0	277	6.06	3.53	1.97	0.31	0.20	0.05
21	35	6.2	2.1	4.1	66	41	25	4.5	7.9	71.0	394	4.71	1.97	2.18	0.40	0.14	0.02
18	19	12.1	4.5	7.6	70	39	31	4.0	5.8	54.0	241	6.57	2.95	1.98	0.47	1.08	0.09
19	26	8.3	3.3	5.0	73	39	34	5.1	6.6	169.0	307	9.57	7.20	1.77	0.52	0.05	0.03
22	18	14.6	4.9	9.7	69	43	26	4.9	7.4	57.0	272	5.03	3.24	1.34	0.35	0.07	0.03
74	59	9.6	4.2	5.4	67	26	41	3.9	3.4	44.0	209	6.77	3.72	2.47	0.44	0.10	0.04
32	29	12.2	4.2	8.0	80	41	39	5.1	3.1	24.0	243	4.41	2.31	1.72	0.35	0.02	0.01
24	19	26.2	10.9	15.3	77	46	31	5.5	3.6	55.0	210	6.73	3.86	2.47	0.26	0.11	0.03
19	15	8.2	3.8	4.4	81	35	46		22.6	818.0	417	9.63	9.07	0.47	0.05	0.03	0.01
20	18	12.8	3.4	9.4	83	47	36		3.2	65.0	366	6.55	4.68	1.49	0.29	0.06	0.03
92	144	7.6	3.1	4.5	78	44	34	5.8	3.8	89.0	398	7.03	3.36	2.64	0.73	0.26	0.04
42	62	13.8	4.4	9.4	79	44	35	4.7	4.6	110.0	405	5.08	3.21	1.33	0.41	0.10	0.03
29	28	12.1	4.9	7.2	64	34	30	5.1	6.7	126.0	618	5.80	3.30	1.92	0.42	0.12	0.04
17	18	25.3	6.6	18.7	84	45	39	5.5	5.0	104.0	446	10.76	7.18	2.62	0.76	0.18	0.02
21	29	14.3	5.3	9.0	68	40	28	5.7	3.0	61.0	347	7.30	0.65	3.90	0.52	0.20	0.03
38	38	14.5	5.4	9.6	60	35	25	5.2	5.6	83.0	347	12.14	8.42	2.82	0.87	0.01	0.02
28	41	8.8	3.7	5.1	78	44	34	4.8	6.3	58.0	194	7.47	4.73	2.24	0.41	0.07	0.02
12	17	16.3	11.8	4.5	64	25	39	13.1	2.6	39.0	177	29.28	24.63	2.16	2.44	0.00	0.05
24	27	14.1	4.0	10.1	76	46	30	4.3	3.9	57.0	300	10.73	8.04	2.12	0.47	0.06	0.04
16	11	9.1	2.7	6.4	78	44	34	4.8	4.1	58.0	234	4.82	2.55	2.01	0.20	0.04	0.02
34	24	13.6	5.2	8.4	87	43	44	4.7	6.9	62.0	302	3.62	1.81	1.22	0.24	0.32	0.03
50	18	26.3	11.5	14.8	74	43	31	4.5	4.3	84.0	411	5.94	2.86	1.39	1.09	0.56	0.04
41	41	15.0	6.2	8.8	64	37	27	3.5	5.3	72.0	420	7.61	4.83	2.11	0.55	0.10	0.02
15	10	10.4	3.3	7.1	82	41	41	9.7	4.7	43.0	271	6.63	4.14	2.04	0.26	0.16	0.03
19	20	7.4	1.9	5.0	68	38	30	4.3	4.9	65.0	398	5.50	3.36	1.62	0.38	0.10	0.04
61	102	17.2	5.0	12.2	79	48	31	6.3	6.2	52.0	418	4.66	2.72	1.67	0.24	0.02	0.01
12	9	7.5	2.4	5.1	69	32	37	4.8	3.5	50.0	135	2.15	0.32	1.72	0.09	0.01	0.01
20	24	8.3	3.3	5.0	64	37	27	4.2	4.0	48.0	309	5.77	3.36	1.80	0.40	0.17	0.04
17	15	9.3	4.1	5.2	69	34	35	5.5	2.8	47.0	255	5.90	4.51	0.79	0.46	0.12	0.02
18	23	4.8	1.2	3.6	65	35	30	6.6	27.9	496.0	571	6.85	4.38	1.52	0.70	0.21	0.04
45	34	8.2	3.6	4.6	70	27	43	4.1	3.9	49.0	316	10.30	8.31	0.99	0.84	0.41	0.02
17	20	10.1	3.9	6.2	75	48	27	4.6	3.8	76.0	311	4.93	3.07	1.53	0.23	0.08	0.02
23	17	7.8	2.6	5.2	77	43	34	4.5	3.4	50.0	261	3.55	2.16	1.16	0.20	0.01	0.02
34	46	10.7	3.9	6.8	80	48	32	4.6	3.5	80.0	490	4.40	2.14	1.85	0.34	0.06	0.01
31	29	10.4	4.0	6.4	78	40	38	4.5	1.9	44.0	471	10.34	7.46	2.00	0.63	0.21	0.04
16	9	4.3	1.3	3.0	72	38	34	4.6	5.1	42.0	312	4.67	2.18	1.97	0.29	0.18	0.05
11	11	10.1	3.9	6.2	64	37	27	5.2	4.4	62.0	290	4.77	3.22	0.91	0.46	0.13	0.05
88	53	26.3	15.9	10.4	73	28	45	5.1	5.1	66.0	376	5.60	3.85	1.16	0.46	0.09	0.04
25	20	8.8	3.1	5.7	63	34	29	4.8	4.6	57.0	319	3.77	1.98	1.42	0.30	0.06	0.01
14	11	9.4	2.4	7.0	88	42	46	4.5	2.8	45.0	273	7.72	5.15	2.00	0.49	0.07	0.01
61	54	13.6	6.8	6.8	69	42	27	4.2	4.1	75.0	324	4.17	1.61	1.75	0.47	0.31	0.03
14	8	10.4	3.8	6.6	72	40	32	4.2	3.9	43.0	406	8.17	4.32	3.28	0.39	0.16	0.02
14	16	13.3	3.9	9.4	73	41	32	4.3	3.1	45.0	347	7.12	4.08	2.43	0.52	0.07	0.02
41	37	16.0	5.6	10.4	82	38	44	7.6	3.7	53.0	291	7.71	3.51	3.18	0.70	0.28	0.04
16	13	9.0	2.7	6.3	78	48	30	4.8	4.4	49.0	297	6.28	4.55	1.43	0.26	0.02	0.02
15	13	6.4	2.9	3.5	79	41	38	5.2	5.1	45.0	306	7.35	4.42	1.88	0.75	0.28	0.02
20	16	11.3	4.1	7.2	75	45	30		2.8	53.0	219	13.88	11.93	1.17	0.76	0.01	0.01
22	20	11.1	3.5	7.6	91	57	34	5.4	3.4	56.0	282	7.32	5.93	1.11	0.27	0.00	0.01
31	35	11.5	4.8	6.7	88	34	54	4.5	1.5	53.0	417	8.47	6.81	1.06	0.47	0.11	0.02
23	25	10.6	3.9	6.7	76	46	30	4.2	5.0	83.0	419	4.97	3.30	1.34	0.28	0.04	0.01
62	55	14.0	5.9	8.1	86	43	43	4.2	3.5	51.0	286	5.26	3.13	1.70	0.29	0.13	0.01
27	59	16.4	4.6	11.8	76	47	29	5.0	4.7	68.0	272	8.53	5.12	2.77	0.47	0.16	0.01
26	22	15.5	5.4	10.1	73	41	32	4.4	3.9	67.0	364	5.50	2.99	2.03	0.36	0.10	0.02
13	6	6.0	2.1	3.9	67	35	32	4.2	4.2	61.0	550	5.49	3.06	2.01	0.30	0.07	0.05
23	18	7.6	2.9	4.7	76	43	33	4.1	3.1	57.0	299	3.31	2.02	1.02	0.23	0.02	0.02
90	336	24.3	11.7	12.6	88	38	50	4.6	2.6	69.0	348	14.52	9.68	2.63	2.06	0.10	0.05
22	22	8.8	2.6	6.2	76	41	35	4.4	3.4	53.0	291	4.23	1.72	1.96	0.27	0.19	0.09
28	30	13.7	4.4	9.3	76	45	31	5.8	5.9	91.0	394	9.68	8.21	1.33	0.12	0.01	0.01
16	12	9.9	3.1	6.8	77	43	34	4.1	5.5	57.0	309	7.77	4.37	2.73	0.49	0.15	0.03
24	22	10.7	3.2	7.5	73	43	30		6.2	53.0	285	4.86	2.21	2.20	0.33	0.08	0.04
16	34	6.7	2.3	4.4	65	40	25	5.5	4.8	85.0	484	6.23	3.52	1.79	0.34	0.53	0.05
189	308	18.5	6.8	11.7	76	46	30	4.8	5.9	82.0	239	4.41	2.27	1.61	0.37	0.13	0.03
18	29	12.8	4.5	8.3	65	40	25		5.1	83.0	349	8.24	4.75	2.82	0.45	0.20	0.02
27	28	12.2	4.7	7.5	64	35	29	4.3	6.7	73.0	284	2.38	1.12	0.93	0.27	0.06	0.00
28	21	10.9	3.3	7.6	87	45	42	5.0	4.2	51.0	332	6.99	5.07	1.43	0.37	0.07	0.05
27	20	16.6	9.5	7.1	50	25	25	7.4	10.2	38.0	238	11.35	9.62	1.37	0.33	0.00	0.03
13	12	14.1	5.4	8.7	76	36	40	5.1	3.9	53.0	194	14.51	11.95	1.33	1.16	0.07	0.03
24	40	43.5	12.0	31.5	78	45	33	5.7	4.8	95.0	460	10.95	8.04	2.02	0.86	0.02	0.01
27	24	9.1	5.0	4.1	66	33	33	4.5	4.6	56.0	382	6.28	5.02	0.90	0.24	0.11	0.01
92	64	107.9	87.2	20.7	84	42	42	4.6	4.0	44.0	281	6.30	4.26	1.48	0.45	0.09	0.02
25	43	12.0	4.8	7.2	76	47	29	5.9	4.2	66.0	521	6.21	4.00	1.80	0.37	0.02	0.02
25	25	3.9	0.6	3.3	77	42	35	4.4	4.1	46.0	297	8.48	5.76	2.16	0.43	0.11	0.02
47	50	23.7	8.9	14.8	78	43	35	5.5	4.4	74.0	444	6.46	5.72	0.64	0.08	0.01	0.01
16	13	11.8	3.6	8.2	76	45	31	4.7	5.6	76.0	465	7.35	5.22	1.60	0.38	0.12	0.03
24	21	10.6	3.5	7.1	74	46	28	5.3	7.2	63.0	451	4.96	3.42	1.29	0.22	0.01	0.02
16	19	8.5	3.2	5.3	75	43	32	4.6	6.4	87.0	672	6.57	3.60	2.35	0.49	0.09	0.04
13	6	7.2	2.1	5.1	74	44	30	4.5	3.7	55.0	297	6.07	3.37	2.25	0.38	0.05	0.02
16	9	10.0	2.9	7.1	68	40	28	4.0	3.9	60.0	320	4.50	2.47	1.74	0.22	0.05	0.02
23	16	10.6	3.5	7.1	76	37	39	4.0	4.8	73.0	488	6.02	2.64	2.65	0.41	0.28	0.04
21	14	11.3	4.2	7.1	60	35	25	4.4	4.0	54.0	376	4.37	1.39	2.23	0.39	0.32	0.04
14	16	18.5	6.6	11.9	75	44	31	6.0	3.7	66.0	204	13.03	11.62	0.97	0.43	0.00	0.01
25	45	12.6	4.4	8.2	65	38	27	3.8	6.2	68.0	327	8.16	4.22	2.72	0.62	0.57	0.03
17	17	14.3	4.2	10.1	80	48	32	6.6	5.6	94.0	443	8.11	4.90	2.32	0.52	0.31	0.06
24	28	7.3	1.9	5.4	79	47	32	4.3	4.9	60.0	263	7.40	4.85	2.05	0.33	0.12	0.05
31	32	5.2	2.2	3.0	72	40	32	3.9	6.5	114.0	664	10.22	5.49	3.70	0.72	0.23	0.08
24	20	8.5	2.4	6.1	80	46	34	4.3	6.1	49.0	236	4.56	2.54	1.67	0.24	0.09	0.02
45	39	12.4	5.2	7.2	60	34	26	4.4	5.4	71.0	399	2.87	1.83	0.79	0.21	0.03	0.01
33	48	42.3	16.7	25.6	76	50	26	3.8	7.4	55.0	381	7.41	3.25	3.65	0.40	0.07	0.04
24	20	11.2	4.4	6.8	66	39	27	4.3	4.9	77.0	350	3.99	2.09	1.49	0.21	0.19	0.01
200	29	24.8	12.9	11.9	67	26	41	3.7	2.5	50.0	305	7.71	4.76	1.72	0.67	0.51	0.05
21	39	16.6	4.6	12.0	68	42	26	3.3	5.7	85.0	490	6.50	3.48	2.39	0.45	0.14	0.04
15	16	10.6	2.6	8.0	81	46	35	4.7	6.6	50.0	374	7.64	5.30	1.83	0.36	0.11	0.04
14	9	7.2	3.1	4.1	66	39	27	4.2	3.9	60.0	315	4.21	2.44	0.51	0.23	0.02	0.01
18	6	4.2	1.3	2.9	72	44	28	4.5	3.4	58.0	294	4.66	2.47	1.87	0.24	0.06	0.02
									2.3	29.0	119	16.19	14.99	0.47	0.72	0.00	0.01
24	31	24.7	9.4	15.3	72	41	31	5.7	6.0	69.0	424	6.40	3.55	2.09	0.53	0.19	0.04
198	73	104.9	84.9	20.0	54	24	30	4.9	5.5	59.0	347	4.67	3.70	0.56	0.36	0.04	0.01
1488	2674	131.3	89.3	42.0	75	40	35	3.0	3.4	78.0	236	4.52	3.01	1.24	0.25	0.01	0.01
12	6	6.2	2.2	4.0	72	42	30	5.0	4.7	51.0	290	8.45	4.56	3.33	0.40	0.13	0.03
45	25	7.2	2.8	4.4	64	30	34	5.7	2.8	35.0	230	3.90	3.02	0.50	0.31	0.04	0.03
19	15	10.2	3.4	6.8	68	43	25	4.8	5.6	41.0	219	4.76	3.19	1.26	0.25	0.05	0.01
18	12	17.4	5.4	12.0	84	50	34		8.5	43.0	248	6.11	3.27	2.11	0.36	0.34	0.03
19	16	6.7	1.7	5.0	78	43	35	4.6	5.2	52.0	347	5.68	2.71	2.14	0.31	0.51	0.01
18	32	8.8	2.9	5.9	71	43	28	4.5	5.2	71.0	313	8.36	4.88	2.31	0.54	0.53	0.10
30	17	11.4	4.9	6.5	72	39	33	4.9	6.7	57.0	339	4.70	2.77	1.41	0.46	0.03	0.03
24	18	12.7	3.6	9.1	76	48	28	4.4	7.0	67.0	344	3.29	1.77	1.20	0.20	0.10	0.02
172	441	18.5	11.9	6.6	62	36	26	4.1	2.7	52.0	311	4.97	2.09	2.33	0.38	0.16	0.01
22	28	8.3	2.7	5.6	72	39	33	4.5	5.0	63.5	324	10.12	7.38	2.08	0.47	0.14	0.05
23	36	27.1	9.5	17.6	74	41	33	3.9	4.7	73.0	404	4.70	2.69	1.66	0.24	0.10	0.01
23	26	7.2	2.7	4.5	62	38	24	4.8	4.8	56.0	319	7.17	4.42	2.31	0.27	0.16	0.01
18	15	16.2	5.0	11.2	54	35	19	4.4	3.8	67.0	338	10.49	9.05	1.14	0.26	0.02	0.02
26	22	8.0	3.3	4.7	66	41	25	4.2	5.5	86.0	278	6.29	3.64	2.25	0.24	0.10	0.06
18	20	11.9	3.6	8.3	77	32	45	5.0	3.3	50.0	254	18.94	15.90	1.96	1.05	0.02	0.01
18	9	25.8	6.8	19.0	72	43	29	3.0	3.6	100.0	377	13.30	9.95	2.27	0.80	0.19	0.09
15	17	10.3	3.1	7.2	76	44	32		3.9	72.0	277	9.09	6.53	1.97	0.44	0.13	0.02
63	50	3.1	1.5	1.6	76	40	36		5.1	50.0	202	5.12	3.88	0.74	0.37	0.12	0.01
372	806	20.5	11.5	9.0	67	35	32		6.4	74.0	314	2.90	1.63	0.85	0.27	0.12	0.03
25	38	10.0	3.6	6.4	74	45	29		6.2	41.0	253	6.65	5.48	0.86	0.26	0.03	0.02
30	31	15.2	4.8	10.4	71	37	34	4.1	13.2	270.0	740	5.85	3.74	1.58	0.33	0.18	0.02
17	13	19.1	6.0	13.1	83	51	32	3.9	6.5	68.0	272	5.98	4.08	1.62	0.23	0.04	0.01
19	16	17.5	4.8	12.7	81	48	33	4.5	4.9	74.0	371	7.07	4.43	2.03	0.52	0.08	0.01
17	18	6.1	1.8	4.3	72	40	32	5.6	3.1	43.0	195	9.19	7.80	1.09	0.27	0.01	0.02
14	17	16.3	6.2	10.1	62	39	23	3.0	3.1	96.0	660	8.73	4.40	3.66	0.50	0.14	0.03
19	20	12.1	4.3	7.8	70	44	26	3.3	3.5	70.0	291	5.26	2.69	2.02	0.32	0.22	0.01
16	16	11.9	4.5	7.4	73	46	27	4.3	4.6	81.0	415	4.92	2.59	1.96	0.33	0.03	0.01
18	13	14.7	4.8	9.9	76	44	32	4.6	5.6	84.0	349	4.96	2.59	1.89	0.35	0.10	0.03
31	25	11.7	5.7	6.0	79	41	38	5.0	4.5	62.0	300	4.47	1.52	2.04	0.70	0.15	0.06
20	28	8.7	2.9	5.8	73	43	30	4.3	5.7	87.0	459	4.94	2.18	2.33	0.27	0.11	0.05
825	1406	198.7	146.2	52.5	68	35	33	4.0	3.7	59.0	231	7.43	4.54	1.34	0.51	0.09	0.04
21	21	5.8	1.1	4.7	75	39	36	5.1	4.5	38.0	250	8.91	5.79	2.28	0.74	0.09	0.01
43	52	21.6	5.7	15.9	81	46	35	3.4	4.8	74.0	502	6.41	3.47	2.53	0.36	0.03	0.02
29	42	8.9	3.3	5.6	74	47	27	4.5	5.4	85.0	416	4.75	2.44	1.97	0.26	0.05	0.03
30	21	9.6	4.0	5.6	71	41	30	5.2	4.5	76.0	455	6.53	4.42	1.52	0.51	0.07	0.01
18	15	10.9	4.9	6.0	65	40	25	4.6	2.9	67.0	390	6.56	3.78	1.94	0.39	0.40	0.05
59	65	9.0	4.3	4.7	60	27	33	3.2	4.3	68.0	385	4.10	2.17	1.39	0.33	0.20	0.01
47	83	15.3	4.9	10.4	82	43	39	6.2	5.2	54.0	447	6.21	3.72	1.95	0.34	0.17	0.03
17	19	8.9	3.3	5.6	69	37	32	5.0	6.0	53.0	371	6.97	4.35	1.47	0.62	0.51	0.02
93	276	13.2	5.6	7.6	69	43	26	5.1	5.4	68.0	325	6.06	3.66	1.91	0.36	0.10	0.03
14	8	8.0	3.5	4.5	77	36	41	5.0	4.3	70.0	351	4.62	2.95	1.30	0.30	0.02	0.05
123	42	5.8	2.8	3.0	63	23	40	7.4	1.5	40.0	177	18.47	16.99	0.97	0.50	0.00	0.01
20	16	4.2	1.0	3.2	76	33	43	3.1	16.6	543.0	349	6.02	3.16	1.89	0.74	0.21	0.02
18	14	12.3	3.7	8.6	75	38	37	4.7	4.2	58.0	326	9.23	6.03	2.67	0.47	0.04	0.02
73	83	8.1	2.4	5.7	83	45	38	4.1	5.4	89.0	429	8.07	5.22	1.78	0.86	0.18	0.03
22	18	8.8	2.3	6.5	84	50	34	4.6	5.2	49.0	270	4.11	2.36	1.42	0.23	0.09	0.01
37	32	20.2	8.2	12.0	80	41	39	4.4	4.5	79.0	446	3.97	2.06	1.42	0.26	0.21	0.02
16	6	10.6	3.1	7.5	80	43	37	4.5	3.7	50.0	273	4.90	1.80	2.71	0.36	0.01	0.02
18	19	6.5	2.1	4.4	74	45	29	5.2	5.3	60.0	324	6.33	3.75	1.91	0.48	0.17	0.02
30	19	8.7	3.4	5.3	67	39	28	4.1	4.0	66.0	346	5.69	2.91	2.18	0.41	0.16	0.03
19	21	13.2	4.5	8.7	76	46	30	4.2	6.3	76.0	246	5.90	3.08	2.02	0.59	0.16	0.05
30	32	34.8	17.5	17.3	58	31	27		3.7	42.0	135	10.14	7.89	1.01	1.15	0.07	0.02
26	18	15.9	6.4	9.5	75	45	30	5.1	4.8	94.0	382	5.21	1.56	3.27	0.26	0.09	0.03
15	13	11.3	4.2	7.1	65	36	29	4.8	5.0	49.0	349	4.97	2.73	1.89	0.28	0.06	0.01
30	66	7.8	2.9	4.9	73	45	28	4.5	2.4	60.0	455	9.05	5.24	2.72	0.43	0.61	0.05
15	14	9.9	2.8	7.1	68	39	29	5.1	5.8	55.0	298	6.62	4.26	1.78	0.47	0.07	0.04
17	19	7.0	2.6	4.4	69	39	30	4.5	3.8	60.0	383	6.37	3.55	2.42	0.30	0.09	0.01
21	15	10.2	3.3	6.9	80	48	32	5.0	3.7	83.0	246	4.37	2.39	1.61	0.23	0.10	0.04
20	15	8.3	2.7	5.6	80	46	34	4.7	5.5	55.0	288	5.01	2.53	1.67	0.34	0.44	0.03
15	9	5.2	1.4	3.8	85	43	42	5.2	3.7	52.0	219	6.71	4.52	1.77	0.31	0.09	0.02
18	12	27.5	9.9	17.6	83	44	39	4.6	4.3	53.0	324	3.81	2.18	1.26	0.24	0.07	0.06
14	13	19.3	6.1	13.2	76	45	31	5.2	4.3	48.0	242	5.15	2.43	2.32	0.27	0.12	0.01
15	92	25.5	13.1	12.4	62	34	28	8.5	7.5	53.0	221	10.24	9.21	0.39	0.63	0.00	0.01
92	64	16.3	6.4	9.9	69	35	34	4.4	3.1	63.0	227	6.14	3.82	1.14	0.73	0.39	0.06
31	20	16.2	7.9	8.3	62	37	25	5.2	6.6	75.0	267	5.49	4.53	0.55	0.24	0.15	0.02
21	13	20.4	6.7	13.7	72	39	33	5.7	5.6	57.0	206	6.69	3.77	2.19	0.66	0.04	0.03
18	11	15.7	4.3	11.4	81	46	35	4.4	5.1	60.0	300	4.65	2.93	1.31	0.29	0.08	0.04
30	51	4.8	2.7	2.1	75	40	35	4.7	3.9	66.0	344	5.67	2.64	2.52	0.33	0.15	0.03
20	14	12.1	3.3	8.8	92	47	45	5.0	5.2	55.0	454	7.67	4.77	2.09	0.66	0.12	0.03
23	31	9.1	5.4	3.7	82	43	39	10.2	16.8	609.0	397	7.92	6.02	1.37	0.36	0.12	0.05
14	16	7.2	2.7	4.5	67	39	28	5.0	3.9	45.0	357	4.63	2.54	1.64	0.27	0.17	0.01
18	10	11.6	3.4	8.2	75	42	33	4.8	2.8	50.0	272	4.92	2.49	1.88	0.45	0.08	0.02
15	12	8.0	2.0	6.0	78	47	31	5.4	4.5	50.0	214	5.99	4.01	1.70	0.24	0.02	0.02
14	20	7.2	2.7	4.5	66	37	29	4.0	4.7	57.0	333	5.64	2.94	2.17	0.34	0.16	0.03
13	10	10.4	4.4	6.0	64	34	30	5.6	6.4	111.0	362	6.18	3.27	2.43	0.32	0.13	0.03
15	24	3.3	0.9	2.4	68	32	36	5.3	2.6	43.0	268	6.16	3.73	1.57	0.49	0.33	0.04
19	14	11.1	3.5	7.6	77	41	36	4.9	6.2	79.0	507	4.50	2.42	1.69	0.30	0.07	0.02
62	47	11.7	4.9	6.8	77	32	45	5.2	4.7	52.0	554	5.48	2.52	2.49	0.39	0.07	0.01
19	8	4.9	1.9	3.0	60	33	27	4.5	4.8	77.0	312	4.54	3.00	0.93	0.40	0.20	0.01
30	31	19.0	7.3	11.7	77	43	34		6.5	89.0	302	3.22	2.10	0.84	0.24	0.03	0.01
16	12	11.0	3.9	7.1	81	48	33	4.5	3.3	52.0	246	6.93	5.04	1.55	0.28	0.04	0.02
19	6	2.8	0.9	1.5	70	36	34		18.2	271.0	565	6.94	4.37	1.99	0.39	0.18	0.01
23	6	9.7	2.5	7.2	71	37	34		2.9	41.0	357	14.15	11.61	1.77	0.73	0.02	0.02
13	10	8.7	3.0	5.7	75	39	36	4.4	3.3	56.0	314	7.28	5.24	1.52	0.44	0.07	0.01
17	9	9.1	3.3	5.8	67	41	26	6.1	3.9	70.0	563	4.12	2.30	1.11	0.44	0.24	0.03
55	51	20.6	6.2	14.4	72	38	34	4.3	4.5	71.0	305	4.53	3.21	0.82	0.27	0.19	0.04
19	25	14.4	5.3	9.1	80	43	37	5.0	4.1	59.0	284	9.66	7.92	1.40	0.33	0.00	0.01
25	35	18.8	6.3	12.5	77	44	33	6.4	3.5	73.0	353	6.32	3.45	2.26	0.40	0.18	0.03
32	34	14.6	5.0	9.6	76	46	30	4.6	5.6	73.0	261	5.50	2.77	2.19	0.38	0.13	0.03
109	205	202.3	165.0	37.3	70	39	31	6.2	6.3	66.0	227	7.49	6.16	0.82	0.43	0.06	0.02
41	16	7.8	1.3	6.5	50	11	39	5.7	5.0	84.0	329	12.61	9.37	2.03	1.14	0.02	0.05
13	12	8.6	2.3	6.3	69	41	28	7.8	6.0	61.0	384	16.25	14.98	0.58	0.61	0.07	0.01
29	28	10.5	3.6	6.9	70	43	27	4.4	4.0	69.0	404	7.53	2.69	3.80	0.44	0.50	0.10
19	21	10.9	3.2	7.7	69	42	27	5.2	5.8	70.0	451	8.02	5.21	2.11	0.42	0.24	0.04
14	20	5.3	1.7	3.6	83	43	40	5.2	2.6	52.0	284	9.30	6.97	1.77	0.42	0.12	0.02
56	27	11.6	3.9	7.7	72	45	27	6.2	3.3	65.0	360	7.86	5.90	1.38	0.54	0.03	0.01
22	41	25.2	9.0	16.2	80	45	35	5.8	4.0	84.0	365	7.70	5.54	1.72	0.38	0.05	0.01
17	10	16.7	5.1	11.6	65	39	26	4.0	5.7	62.0	257	5.59	3.43	1.60	0.45	0.09	0.02
11	9	18.9	6.6	12.3	70	45	25		6.0	81.0	312	5.67	3.40	1.51	0.40	0.28	0.08
40	56	13.2	5.0	8.2	80	40	40	4.2	4.5	60.0	276	4.40	1.99	2.11	0.23	0.06	0.01
17	18	11.6	3.3	8.3	66	42	24	3.9	5.1	67.0	295	5.00	2.00	2.58	0.32	0.08	0.02
22	36	18.3	5.4	12.9	76	47	29	5.2	4.1	85.0	303	7.18	4.19	2.51	0.42	0.03	0.03
206	164	32.7	15.0	17.7	64	37	27	4.6	4.7	67.0	414	6.35	3.82	1.95	0.56	0.00	0.02
19	26	13.3	3.9	9.4	79	45	34	7.4	5.4	88.0	418	5.62	3.61	1.45	0.33	0.19	0.04
45	97	12.3	3.6	8.7	77	46	31	5.0	5.9	79.0	454	7.56	4.76	2.20	0.39	0.14	0.07
21	19	3.9	1.3	2.6	83	30	53	10.2	5.8	64.0	273	2.57	2.40	0.13	0.04	0.00	0.00
19	23	12.6	4.7	7.9	58	36	22	4.7	4.0	75.0	364	6.39	2.38	3.17	0.45	0.35	0.04
22	16	11.6	3.5	8.1	78	47	31	4.7	2.8	50.0	266	4.59	1.78	2.59	0.14	0.06	0.02
102	94	28.0	11.1	16.9	63	31	32	4.7	4.6	67.0	205	3.28	2.11	0.90	0.24	0.02	0.01
50	80	15.5	6.1	9.4	68	35	33	5.2	5.2	68.0	379	9.19	5.96	2.29	0.69	0.22	0.03
22	24	13.7	4.6	9.1	68	35	33	5.1	3.6	66.0	323	5.43	2.80	1.91	0.46	0.23	0.03
16	32	8.6	3.2	5.4	66	42	24	5.4	5.3	67.0	502	6.87	4.34	1.56	0.48	0.40	0.09
23	37	8.2	2.3	5.9	83	48	35	4.7	9.4	86.0	467	5.90	3.84	1.57	0.36	0.11	0.02
39	30	11.1	3.5	7.6	75	46	29	4.4	4.9	64.2	232	5.88	3.31	2.27	0.22	0.08	0.00
40	43	10.0	3.6	6.4	83	48	35	4.7	5.3	60.7	318	4.71	2.46	1.75	0.21	0.25	0.04
24	24	17.6	7.6	10.0	78	45	33	3.6	6.7	57.0	243	5.70	3.44	2.02	0.17	0.04	0.03
16	18	7.8	2.2	5.6	78	47	31	4.7	3.7	48.9	251	7.52	3.97	2.53	0.63	0.33	0.06
31	33	8.4	2.1	6.3	83	45	38	5.0	4.7	48.1	212	4.38	2.44	1.66	0.24	0.03	0.01
15	<6	6.3	1.9	4.4	68	39	29	4.6	3.6	49.0	265	4.5	2.06	1.19	0.27	0.10	0.03
44	60	25.5	7.0	18.5	79	45	34	6.0	3.9	62.0	362	4.17	2.22	1.55	0.34	0.05	0.01
16	12	13.4	5.3	8.1	73	43	30	4.0	3.7	54.0	273	3.86	1.99	1.49	0.23	0.14	0.01
22	18	11.5	3.5	8.0	64	38	26	4.6	5.9	55.0	230	3.92	1.62	1.77	0.32	0.16	0.05
17	18	6.0	1.8	4.2	53	26	27	4.9	2.9	38.0	162	5.33	3.93	1.03	0.32	0.04	0.01
16	18	6.8	2.4	4.4	71	37	34	4.7	4.1	45.0	285	8.32	4.97	2.69	0.47	0.17	0.02
30	34	8.9	2.0	6.9	81	45	36	4.0	3.3	45.0	337	6.12	3.38	2.40	0.24	0.07	0.03
29	34	7.6	3.7	3.9	49	24	25	4.1	4.5	64.0	219	2.37	1.13	0.66	0.51	0.04	0.03
18	26	9.5	3.6	5.9	72	44	28	4.4	2.0	49.0	206	5.70	3.76	1.45	0.37	0.09	0.03
79	178	18.3	6.2	12.1	78	47	31	4.7	4.9	79.0	434	8.23	3.79	3.48	0.54	0.19	0.05
24	71	14.3	5.1	9.2	82	51	31	4.5	4.6	78.0	436	7.50	5.01	1.79	0.45	0.21	0.04
38	56	8.2	2.8	5.4	70	38	32	4.7	7.9	84.0	309	5.39	1.93	3.01	0.23	0.20	0.02
14	11	11.8	4.8	7.0	73	39	34	5.1	1.2	56.0	172	12.12	9.77	1.51	0.72	0.11	0.01
