# Supplementary material for: Genetic polymorphisms in the IFNL4, MxA, and MxB genes were associated with biochemical index of chronic HBV patients from Yunnan, China
Source: PeerJ. 2022 Apr 28;10:e13353. doi: 10.7717/peerj.13353 (PMC9057288; doi:10.7717/peerj.13353)
Supplement: Supplemental Information 2 [file peerj-10-13353-s002.xlsx]

## Sheet: HBV patients
sample	Rs11322783	Rs117648444	rs2071430	rs17000900	rs9982944	rs408825	rs2838029
449	T T	G G	G G	C C	G G	C C	A G
506	T T	G G	G T	C C	G G	T T	G G
566	T T	G G	G T	C C	A G	T T	G G
615	T T	G G	G G	C C	G G	C T	A G
646	T T	G G	T T	A C	A A	C T	G G
691	T T	G G	G G	C C	G G	C T	G G
739	G T	G G	G T	C C	A G	T T	G G
787	T T	G G	G G	C C	G G	T T	G G
467	T T	G G	G T	C C	A G	T T	G G
516	T T	G G	G T	C C	G G	C T	A G
573	T T	G G	G G	C C	G G	T T	G G
616	T T	G G	G T	A C	A G	T T	G G
649	T T	G G	G G	C C	G G	C C	A G
700	T T	G G	G T	A C	G G	C T	A G
741	T T	G G	G G	C C	G G	T T	G G
788	T T	G G	G T	A C	G G	C T	G G
470	T T	G G	G T	A C	G G	T T	G G
517	T T	G G	G G	C C	A G	T T	G G
581	T T	G G	G T	A C	G G	T T	G G
617	T T	G G	G G	C C	A A	T T	G G
658	T T	G G	G T	A C	A G	C C	A G
701	T T	G G	G G	C C	A A	T T	G G
742	T T	G G	G G	C C	G G	T T	G G
791	T T	G G	G G	C C	A G	C T	G G
473	T T	G G	G G	C C	G G	T T	G G
518	T T	G G	G G	C C	A G	T T	G G
584	T T	G G	G T	A C	G G	C C	A G
618	T T	G G	G G	C C	G G	T T	G G
660	T T	G G	G T	C C	G G	T T	G G
705	T T	G G	G G	C C	G G	T T	G G
744	T T	G G	G T	A C	A G	T T	G G
793	T T	G G	G T	A C	A G	C T	G G
477	T T	G G	T T	A C	A A	C T	G G
519	T T	G G	G G	C C	A G	C T	A G
586	T T	G G	T T	C C	A G	T T	G G
622	T T	G G	G G	C C	G G	T T	G G
661	T T	G G	G T	C C	A G	T T	G G
707	T T	G G	G G	C C	A G	T T	G G
747	T T	G G	G T	C C	G G	T T	G G
795	T T	G G	G T	C C	G G	T T	G G
485	T T	G G	G T	C C	G G	T T	G G
527	T T	G G	G G	C C	G G	T T	G G
587	T T	G G	G G	C C	G G	T T	G G
625	T T	G G	G T	C C	G G	T T	G G
663	T T	G G	G G	C C	A G	T T	G G
710	T T	G G	G T	C C	G G	C T	G G
751	T T	G G	G G	C C	G G	C T	A G
798	T T	G G	T T	A C	A G	T T	G G
489	G T	A G	G G	C C	G G	T T	G G
533	T T	G G	G G	C C	G G	C T	A G
592	T T	G G	G G	C C	A G	C T	G G
627	T T	G G	G G	C C	A G	T T	G G
666	T T	G G	T T	A C	G G	T T	G G
719	T T	G G	G G	C C	G G	C T	A G
757	T T	G G	G G	C C	A G	C C	A G
801	T T	G G	G G	C C	A G	C T	A G
490	T T	G G	G G	C C	A G	C T	A G
542	T T	G G	G T	C C	A G	T T	G G
593	T T	G G	T T	A C	G G	T T	G G
629	T T	G G	G G	C C	G G	C T	A G
674	T T	G G	G G	C C	A G	T T	G G
720	T T	G G	G G	C C	G G	T T	G G
767	G T	G G	T T	A A	A G	T T	G G
802	T T	A G	G T	A C	G G	T T	G G
500	T T	G G	G G	C C	G G	T T	G G
544	T T	G G	G T	C C	G G	C T	G G
603	T T	G G	G G	C C	A A	C T	G G
633	T T	G G	G G	C C	A A	T T	G G
679	T T	G G	G G	C C	A G	C T	G G
724	T T	G G	G G	C C	G G	C T	G G
776	T T	G G	G T	A C	G G	T T	G G
804	T T	G G	G T	C C	G G	T T	G G
501	T T	G G	G T	A C	A G	T T	G G
550	G G	G G	G T	A C	A G	C T	G G
606	T T	G G	G T	C C	A G	T T	G G
635	T T	G G	T T	A A	G G	T T	G G
687	T T	G G	G G	C C	A G	T T	G G
729	T T	G G	T T	C C	G G	T T	G G
781	T T	G G	G G	C C	A A	T T	G G
806	T T	G G	G G	C C	G G	T T	G G
503	T T	G G	G G	C C	A G	C T	A G
551	T T	G G	G G	C C	G G	T T	G G
608	T T	G G	G G	C C	A G	C T	G G
636	T T	G G	G T	C C	A G	T T	G G
688	T T	G G	T T	A A	A G	C T	G G
731	T T	G G	G G	C C	A G	T T	G G
782	T T	G G	G G	C C	G G	T T	G G
807	G T	A G	G T	C C	A G	C T	A G
505	T T	G G	G T	A A	A G	C T	G G
552	T T	G G	T T	C C	A A	T T	G G
613	T T	G G	G T	C C	A A	T T	G G
637	T T	G G	G G	C C	A G	T T	G G
690	T T	G G	G T	C C	A A	T T	G G
736	T T	G G	T T	A A	A G	C C	G G
784	T T	G G	G T	C C	G G	T T	G G
811	T T	G G	G G	C C	G G	T T	G G
813	T T	G G	G T	A C	A G	T T	G G
856	G T	G G	G G	C C	A G	C C	A G
903	T T	G G	G G	C C	G G	T T	G G
940	G T	G G	G G	C C	G G	T T	G G
1002	T T	G G	G G	C C	A G	T T	G G
1033	T T	G G	G T	A C	G G	T T	G G
1071	T T	G G	G T	A C	A G	T T	G G
814	T T	G G	G G	C C	A G	T T	G G
862	T T	G G	G T	A C	A A	T T	G G
905	G T	G G	G T	A C	A G	T T	G G
941	T T	G G	G T	C C	A G	C T	A G
971	T T	G G	G G	C C	A G	T T	G G
1007	T T	G G	G T	A C	A G	T T	G G
1035	T T	G G	G T	A C	A G	T T	G G
1073	T T	G G	G G	C C	G G	T T	G G
816	T T	G G	G G	C C	G G	T T	G G
865	G T	A G	G G	C C	A G	T T	G G
908	T T	G G	G T	C C	A G	T T	G G
945	T T	G G	G T	A C	A G	T T	G G
972	T T	G G	G G	C C	G G	C T	G G
1008	T T	G G	G G	C C	G G	T T	G G
1036	T T	G G	G T	A C	G G	T T	G G
1076	T T	G G	G G	C C	A G	T T	G G
826	T T	G G	G G	C C	A G	C T	A G
869	T T	G G	G G	C C	G G	T T	G G
912	T T	G G	T T	C C	A G	T T	G G
948	T T	G G	G G	C C	G G	C T	G G
978	T T	G G	G T	A C	G G	C T	G G
1009	T T	G G	G G	C C	G G	T T	G G
1038	T T	G G	G G	C C	G G	T T	G G
1078	G T	G G	G T	A C	A G	T T	G G
828	T T	G G	G G	C C	G G	T T	G G
878	T T	G G	G T	A C	A G	C T	G G
913	T T	G G	G T	C C	A G	T T	G G
950	T T	G G	G G	C C	G G	T T	G G
979	T T	G G	G T	A C	G G	C T	G G
1012	T T	G G	G T	A C	A G	T T	G G
1041	G T	G G	G T	A C	A G	C T	G G
1080	G T	A G	G G	C C	G G	C C	A A
829	T T	G G	G T	A C	A G	T T	G G
879	T T	G G	T T	C C	A G	C T	G G
917	G T	G G	G G	C C	G G	T T	G G
954	T T	G G	G T	C C	A A	C T	G G
980	T T	G G	G G	C C	G G	C T	G G
1013	T T	G G	G G	C C	A G	C T	G G
1042	T T	G G	G G	C C	G G	C T	G G
1083	T T	G G	G T	A C	A G	T T	G G
834	G T	G G	G T	A C	A G	C T	G G
882	T T	G G	T T	A C	A A	T T	G G
921	T T	G G	G G	C C	A G	T T	G G
957	G T	G G	G T	A C	A G	T T	G G
990	T T	G G	G T	C C	A G	T T	G G
1016	T T	G G	G G	C C	G G	C C	G G
1044	T T	G G	T T	A A	A G	T T	G G
1091	T T	G G	G T	C C	G G	T T	G G
844	T T	G G	G G	C C	A G	C T	G G
886	T T	G G	G T	A C	A G	C T	G G
925	T T	G G	G T	A C	A G	T T	G G
959	G T	G G	G G	C C	A G	T T	G G
992	T T	G G	G G	C C	A G	T T	G G
1021	T T	G G	G T	A C	A G	T T	G G
1046	G T	G G	T T	A C	A G	T T	G G
1092	T T	G G	G G	C C	A G	C T	A G
848	T T	G G	G G	C C	G G	T T	G G
887	G T	G G	G G	C C	G G	T T	A G
930	T T	G G	G G	C C	G G	T T	G G
963	T T	G G	G T	C C	A G	C T	A G
993	T T	G G	G G	C C	A G	C T	G G
1026	T T	G G	G T	A C	A G	T T	G G
1062	T T	G G	G G	C C	A G	C T	G G
1097	T T	G G	G T	A C	A G	C T	G G
851	T T	G G	G T	A C	A G	T T	G G
888	T T	G G	G T	C C	A G	T T	G G
932	G T	G G	G T	A C	A G	T T	G G
965	T T	G G	G T	A C	G G	T T	G G
997	T T	G G	G T	C C	G G	T T	G G
1030	T T	G G	G G	C C	G G	C T	G G
1063	G T	G G	G T	A C	A G	T T	G G
1099	T T	G G	T T	A C	A G	T T	G G
852	T T	G G	G T	A C	A G	T T	G G
892	T T	G G	G G	C C	A G	C T	A G
937	G T	G G	G T	C C	G G	C C	A G
966	T T	G G	G T	A C	G G	T T	G G
1000	G T	G G	G G	C C	A G	T T	G G
1031	T T	G G	T T	A A	A G	T T	G G
1065	T T	G G	G G	C C	A G	T T	G G
1100	T T	G G	G G	C C	G G	T T	G G
854	T T	G G	G G	C C	G G	T T	G G
902	T T	G G	G G	C C	A A	T T	G G
939	T T	G G	T T	C C	G G	T T	G G
967	T T	G G	G T	C C	G G	T T	G G
1001	T T	G G	G G	C C	A G	T T	G G
1032	T T	G G	G G	C C	G G	T T	G G
1068	T T	G G	G T	C C	A G	C T	A G
1105	T T	G G	G G	C C	A G	C T	G G
1112	T T	G G	T T	A C	A G	T T	G G
1147	T T	G G	G G	C C	A G	T T	G G
1200	T T	G G	G T	A C	G G	T T	G G
1229	T T	G G	G G	C C	G G	C T	G G
1297	G T	A G	G T	A C	A G	C T	A G
1361	T T	G G	T T	A C	A G	C C	A G
1382	T T	G G	G G	C C	G G	T T	G G
1408	T T	G G	G G	C C	G G	C T	A G
1116	T T	G G	G T	C C	G G	T T	G G
1149	T T	G G	G G	C C	G G	T T	G G
1203	T T	G G	G G	C C	G G	C T	G G
1230	G T	A G	G G	C C	G G	T T	G G
1298	T T	G G	T T	C C	G G	T T	G G
1363	T T	G G	T T	A C	A G	T T	G G
1384	T T	G G	G G	C C	G G	T T	G G
1410	T T	G G	G T	A C	A G	T T	G G
1117	T T	G G	G T	A C	G G	C T	G G
1158	T T	G G	T T	C C	G G	C T	G G
1205	T T	G G	G G	C C	G G	C T	A G
1238	T T	G G	G G	C C	G G	T T	G G
1307	T T	G G	G G	C C	G G	T T	G G
1367	T T	G G	G T	C C	A G	T T	G G
1385	T T	G G	G T	C C	G G	T T	G G
1417	T T	G G	G G	C C	A G	C T	A G
1121	T T	G G	G G	C C	G G	T T	G G
1161	T T	G G	G G	C C	G G	T T	G G
1209	T T	G G	G G	C C	G G	T T	G G
1240	T T	G G	G T	C C	A G	C T	G G
1317	T T	G G	G G	C C	G G	T T	G G
1368	T T	G G	G G	C C	G G	T T	G G
1387	T T	G G	G G	C C	G G	C T	G G
1419	T T	G G	G T	A C	A G	T T	G G
1124	G T	G G	G G	C C	G G	C C	A G
1168	T T	A G	G G	C C	G G	C T	G G
1214	T T	G G	G G	C C	G G	T T	G G
1241	T T	G G	G T	C C	G G	T T	G G
1321	T T	G G	T T	C C	A A	T T	G G
1369	T T	G G	G G	C C	G G	T T	G G
1391	T T	G G	T T	A A	A G	T T	G G
1422	T T	G G	G G	C C	G G	T T	G G
1126	T T	G G	G G	C C	G G	T T	G G
1172	T T	G G	G G	C C	G G	C T	A G
1215	T T	G G	G G	C C	G G	C T	G G
1243	T T	G G	G T	A C	G G	C C	A G
1322	T T	G G	G G	C C	G G	T T	G G
1370	T T	G G	G G	C C	G G	T T	G G
1392	T T	G G	G T	C C	A G	T T	G G
1423	T T	G G	G G	C C	A G	T T	G G
1130	T T	G G	G G	C C	G G	T T	G G
1173	T T	G G	G T	A C	A A	C T	G G
1217	T T	G G	G G	C C	A G	C C	G G
1250	T T	G G	G T	C C	A G	C T	G G
1326	T T	G G	G G	C C	G G	C T	G G
1371	T T	G G	G G	C C	G G	T T	G G
1393	T T	G G	G G	C C	A G	T T	G G
1429	T T	G G	G T	C C	A G	T T	G G
1131	T T	G G	G G	C C	A G	T T	G G
1184	T T	G G	G G	C C	G G	T T	G G
1218	G T	G G	G G	C C	A G	T T	G G
1254	T T	G G	G G	C C	A G	T T	G G
1329	T T	G G	T T	A C	A A	C T	G G
1373	T T	G G	G G	C C	G G	T T	G G
1396	T T	G G	T T	A C	A G	T T	G G
1433	T T	G G	T T	A A	A G	C T	G G
1132	T T	G G	G T	A C	A G	C T	A G
1186	T T	G G	G G	C C	G G	T T	G G
1222	T T	G G	G G	C C	G G	T T	G G
1263	T T	G G	G G	C C	A G	C C	G G
1330	T T	G G	G T	A C	A G	T T	G G
1374	T T	G G	G G	C C	G G	T T	G G
1397	T T	G G	G G	C C	G G	T T	G G
1436	T T	G G	G G	C C	A G	T T	G G
1134	G T	G G	G G	C C	G G	T T	G G
1188	T T	G G	G G	C C	G G	T T	G G
1225	T T	G G	G T	C C	A G	C T	A G
1268	T T	G G	G G	C C	G G	T T	G G
1339	T T	G G	G G	C C	G G	T T	G G
1375	T T	G G	G G	C C	G G	C T	G G
1403	T T	G G	G G	C C	G G	T T	G G
1442	T T	G G	G T	A C	A G	C T	A G
1140	T T	G G	G T	A C	A G	T T	G G
1194	T T	G G	G T	C C	G G	T T	G G
1226	T T	G G	G T	A C	G G	T T	G G
1279	T T	G G	T T	A C	A G	T T	G G
1344	G T	G G	G G	C C	G G	T T	G G
1377	T T	G G	G G	C C	G G	T T	G G
1404	T T	G G	G T	C C	A G	T T	G G
1444	T T	G G	G G	C C	G G	T T	G G
1146	G T	G G	G T	C C	G G	C T	A G
1199	T T	G G	G G	C C	G G	C T	A G
1228	T T	G G	T T	A A	A A	T T	G G
1292	T T	G G	T T	A A	A G	T T	G G
1351	T T	G G	G G	C C	A G	T T	G G
1381	T T	G G	G G	C C	G G	C T	G G
1405	T T	G G	G T	C C	A A	T T	G G
1445	T T	G G	G T	C C	A G	T T	G G
1446	T T	G G	G T	A C	A G	T T	G G
1479	T T	G G	G T	A C	A G	T T	G G
1506	T T	G G	G G	C C	A G	C T	G G
1550	T T	G G	G G	C C	A G	C T	G G
1608	T T	G G	G T	A C	A G	T T	G G
1653	T T	G G	G T	A C	A G	T T	G G
1717	T T	G G	G G	C C	A G	T T	G G
1447	T T	G G	T T	A C	A G	T T	G G
1482	T T	G G	G T	C C	A A	T T	G G
1515	T T	G G	G G	C C	G G	T T	G G
1552	T T	G G	T T	A C	A A	T T	G G
1579	T T	G G	G T	C C	A G	T T	G G
1621	T T	G G	G G	C C	G G	T T	G G
1661	T T	G G	G G	C C	A G	C T	A G
1720	T T	G G	G G	C C	G G	C T	G G
1450	T T	G G	G G	C C	A G	C T	G G
1486	T T	A G	G T	A C	A G	C T	G G
1516	T T	G G	T T	A C	A A	T T	G G
1554	T T	G G	G T	A C	G G	T T	G G
1580	G T	G G	G T	C C	A G	C T	G G
1628	T T	G G	G T	C C	A G	T T	G G
1666	T T	G G	G T	C C	A G	T T	G G
1732	T T	G G	G T	C C	A G	T T	G G
1453	T T	G G	G G	C C	A G	C T	A G
1487	T T	G G	G T	A C	A A	T T	G G
1519	T T	G G	G T	C C	G G	C C	G G
1557	T T	G G	G T	C C	G G	T T	G G
1582	T T	G G	G G	C C	G G	T T	G G
1630	T T	G G	G T	C C	A G	T T	G G
1667	T T	G G	G T	A C	A A	T T	G G
1733	T T	G G	G G	C C	G G	C T	A G
1457	T T	G G	G G	C C	A G	C T	G G
1488	T T	G G	G G	C C	A A	T T	G G
1521	T T	G G	G T	C C	A G	T T	G G
1558	G T	G G	G G	C C	G G	C T	A G
1586	T T	G G	G G	C C	G G	T T	G G
1631	T T	G G	T T	A C	A G	T T	G G
1669	T T	G G	T T	A C	A G	C T	G G
1746	T T	G G	T T	A C	A G	T T	G G
1459	T T	G G	G T	C C	A G	T T	G G
1489	T T	G G	G T	A C	A G	T T	G G
1522	T T	G G	G T	C C	A G	T T	G G
1563	T T	G G	G G	C C	G G	T T	G G
1587	T T	G G	G T	C C	A G	T T	G G
1633	T T	G G	T T	A C	A G	C T	G G
1673	T T	G G	G T	C C	G G	T T	G G
1747	T T	G G	G T	C C	A G	T T	G G
1460	T T	A G	G G	A C	A G	C T	G G
1492	T T	G G	G G	C C	G G	T T	G G
1523	T T	G G	G G	C C	G G	T T	G G
1564	T T	G G	G T	A C	A A	T T	G G
1590	T T	G G	G G	C C	G G	T T	G G
1636	T T	G G	G G	C C	A G	T T	G G
1674	T T	G G	G G	C C	G G	T T	G G
1748	T T	G G	G G	C C	G G	C T	G G
1466	T T	G G	G G	C C	A G	T T	G G
1495	T T	G G	G T	A C	A G	T T	G G
1524	T T	G G	G G	C C	G G	C T	G G
1565	T T	G G	G G	C C	A G	T T	G G
1592	T T	G G	G T	C C	A G	T T	G G
1638	T T	G G	G T	A C	A G	T T	G G
1679	T T	G G	G T	A C	A G	C T	A G
1749	T T	G G	T T	C C	A G	T T	G G
1467	T T	G G	G G	C C	A G	C T	G G
1496	T T	G G	G T	C C	A A	C C	G G
1525	G T	G G	G G	C C	G G	T T	G G
1569	T T	G G	G G	C C	G G	T T	G G
1599	T T	G G	G G	C C	A G	T T	G G
1643	T T	G G	G G	C C	A A	C T	G G
1680	T T	G G	G T	A C	A G	C T	G G
1750	T T	G G	G T	A C	G G	T T	G G
1468	T T	G G	G G	C C	A G	T T	G G
1497	T T	G G	G T	A C	A G	T T	G G
1532	T T	G G	T T	A C	A A	T T	G G
1575	T T	G G	G G	C C	G G	T T	G G
1605	T T	G G	G T	A C	A G	T T	G G
1644	T T	G G	G G	C C	G G	T T	G G
1694	T T	G G	G T	A C	A G	T T	G G
1753	T T	G G	G T	C C	G G	C T	G G
1472	T T	G G	G T	A C	A G	C T	A G
1500	T T	G G	G G	C C	G G	T T	G G
1536	T T	G G	G T	C C	A G	T T	G G
1576	T T	G G	G T	A C	A G	C T	A G
1606	T T	G G	G T	A C	A G	C T	G G
1649	T T	G G	G T	C C	A G	C C	A G
1694	T T	G G	G G	C C	G G	T T	G G
1758	T T	G G	G G	C C	G G	C T	G G
1475	T T	G G	T T	A C	A G	T T	G G
1501	T T	G G	G G	C C	G G	T T	G G
1544	T T	G G	G T	A C	A G	T T	G G
1577	T T	G G	G G	C C	G G	C T	A G
1607	T T	G G	G T	A C	A A	C T	G G
1650	T T	G G	G T	C C	A G	T T	G G
1709	T T	G G	T T	C C	A A	C T	G G
1772	T T	G G	G G	C C	A G	T T	G G
1759	G T	G G	T T	C C	A A	C T	A G
1786	T T	G G	G G	C C	A G	T T	G G
1803	T T	G G	G G	C C	G G	T T	G G
1857	T T	G G	G G	C C	G G	C T	A G
1902	T T	G G	G T	C C	A G	T T	G G
1938	T T	G G	G T	C C	A G	C T	A G
1765	T T	G G	T T	A C	G G	C T	A G
1787	G T	G G	G T	C C	A G	C T	G G
1807	T T	G G	G G	C C	A G	T T	G G
1863	T T	G G	G G	C C	G G	T T	G G
1903	T T	G G	G G	C C	G G	T T	G G
1941	T T	G G	G T	A C	G G	T T	G G
1766	T T	G G	G G	C C	G G	T T	G G
1790	T T	G G	G G	C C	G G	T T	G G
1808	T T	G G	G G	C C	G G	C T	G G
1868	T T	G G	G G	C C	G G	C C	A G
1911	T T	G G	G T	A C	A G	C T	A G
1942	T T	G G	G T	C C	A G	C T	G G
1769	T T	G G	G G	C C	A G	T T	G G
1791	T T	G G	G T	C C	A A	T T	G G
1809	T T	G G	G G	C C	G G	T T	G G
1882	G T	G G	G T	C C	A G	T T	G G
1914	T T	G G	G G	C C	G G	T T	G G
1943	T T	G G	G G	C C	G G	T T	G G
1773	T T	G G	G G	C C	G G	C T	A G
1792	T T	G G	G G	C C	G G	C T	A G
1810	G T	G G	G T	C C	A G	C T	A G
1883	T T	G G	G G	C C	G G	T T	G G
1915	T T	G G	G G	C C	G G	T T	G G
1947	T T	G G	G T	C C	A G	T T	G G
1775	T T	G G	T T	A C	A G	T T	G G
1793	T T	G G	G G	C C	A G	T T	G G
1812	T T	G G	G T	C C	A G	T T	G G
1886	T T	G G	G T	C C	G G	T T	G G
1921	T T	G G	G T	C C	A G	C T	A G
1948	T T	G G	G G	C C	G G	T T	G G
1777	G T	A G	G T	C C	G G	C T	G G
1795	T T	G G	G G	C C	G G	T T	G G
1818	G T	G G	T T	A C	A G	T T	G G
1891	T T	G G	G G	C C	G G	T T	G G
1923	G T	G G	G G	C C	A G	T T	G G
1778	T T	G G	G T	A C	A A	T T	G G
1796	T T	G G	G T	C C	A A	T T	G G
1823	T T	G G	G G	C C	G G	T T	G G
1892	T T	G G	T T	A C	A A	T T	G G
1924	T T	G G	G T	A C	G G	T T	G G
1779	T T	G G	G T	A C	A G	T T	G G
1797	T T	G G	G G	C C	G G	T T	G G
1833	T T	G G	G T	C C	A G	C T	G G
1895	T T	G G	G G	C C	G G	C T	G G
1926	T T	G G	G G	C C	G G	C T	G G
1782	T T	G G	G G	C C	G G	T T	G G
1798	T T	G G	G G	C C	G G	T T	G G
1837	G T	G G	G G	C C	G G	T T	G G
1897	T T	G G	G G	C C	G G	C T	A G
1927	T T	G G	G G	C C	G G	C T	A G
1783	T T	G G	G T	C C	A G	T T	G G
1800	T T	G G	G G	C C	G G	T T	G G
1846	T T	G G	G G	C C	G G	T T	G G
1898	T T	G G	G G	C C	G G	T T	G G
1928	T T	G G	T T	A A	A G	T T	G G
1785	T T	G G	G G	C C	G G	T T	G G
1802	G T	G G	G T	A C	A G	T T	G G
1852	T T	G G	G G	C C	A A	C T	G G
1899	T T	G G	G G	C C	G G	T T	G G
1929	T T	G G	G G	C C	G G	C T	G G

## Sheet: control samples
sample	Rs11322783	Rs117648444	rs2071430	rs17000900	rs9982944	rs408825	rs2838029
7	T T	G G	G G	C C	A G	T T	G G
26	T T	G G	G T	A C	G G	T T	G G
57	T T	G G	G T	C C	G G	C T	G G
86	T T	G G	G T	A C	A G	T T	G G
119	T T	G G	G G	C C	A G	T T	G G
147	T T	G G	G G	C C	A G	T T	G G
175	T T	G G	G G	C C	A G	T T	G G
196	T T	G G	G T	A C	G G	C T	A G
8	T T	G G	T T	A A	G G	T T	G G
27	T T	G G	G T	A C	G G	T T	G G
58	T T	G G	G G	C C	A G	T T	G G
89	T T	G G	G T	C C	A G	T T	G G
123	G T	G G	G G	C C	A G	C T	A G
148	T T	G G	G G	C C	G G	C T	G G
177	T T	G G	G T	A C	A G	T T	G G
197	T T	G G	G G	C C	A G	T T	G G
12	T T	G G	G T	C C	A G	T T	G G
40	T T	G G	G T	A C	G G	T T	G G
61	T T	G G	G T	C C	A G	T T	G G
91	T T	G G	G G	C C	G G	T T	G G
124	T T	G G	G G	C C	A A	T T	G G
149	T T	G G	G G	C C	G G	C T	A G
178	T T	G G	G G	C C	A G	C T	G G
198	T T	G G	G T	C C	A G	T T	G G
13	T T	G G	G T	A C	A A	T T	G G
41	T T	G G	G T	C C	A G	C T	G G
64	T T	G G	G T	C C	G G	T T	G G
92	T T	G G	G G	C C	A G	C C	G G
126	G T	G G	T T	A C	G G	T T	G G
154	T T	G G	G G	C C	G G	C T	G G
179	T T	G G	G T	C C	G G	C T	A G
199	T T	G G	G T	A C	A G	T T	G G
14	T T	G G	G T	A C	A G	T T	G G
44	T T	G G	G G	C C	G G	C C	G G
67	T T	G G	G T	A C	G G	T T	G G
94	T T	G G	T T	A A	A G	T T	G G
132	T T	G G	G T	A C	A A	T T	G G
155	G T	G G	G T	A C	G G	T T	G G
181	T T	G G	G T	C C	G G	T T	G G
204	G T	G G	T T	A C	A G	C T	G G
18	T T	A G	G T	C C	A A	C T	A G
45	T T	G G	G G	C C	A G	C C	G G
68	T T	G G	T T	C C	G G	T T	G G
95	T T	G G	G G	C C	A G	C T	G G
136	T T	G G	G T	C C	G G	C T	A G
158	T T	G G	G T	A C	A G	T T	G G
182	T T	G G	G G	C C	G G	T T	G G
206	T T	G G	G G	C C	G G	C C	A G
20	T T	G G	G G	C C	A G	C T	G G
48	T T	G G	G G	C C	A G	T T	G G
71	T T	G G	G T	C C	G G	T T	G G
96	T T	G G	T T	A A	A G	T T	G G
138	T T	G G	G G	C C	A G	T T	G G
159	T T	G G	G G	C C	A G	C C	A A
183	T T	G G	G T	A C	G G	T T	G G
207	T T	G G	G T	C C	A A	C T	G G
21	T T	G G	T T	A C	G G	T T	G G
51	T T	G G	G T	C C	A A	C T	G G
73	G T	G G	G T	A C	A A	T T	G G
100	T T	G G	G T	A C	A G	T T	G G
140	G T	G G	T T	A C	A G	T T	G G
160	T T	G G	G G	C C	G G	T T	G G
190	T T	G G	G G	C C	G G	T T	G G
208	T T	G G	G T	A C	G G	T T	G G
22	T T	G G	G G	C C	G G	T T	G G
52	T T	G G	G G	C C	G G	C T	G G
82	G T	G G	G T	C C	A G	C T	G G
102	T T	G G	G G	C C	G G	C T	G G
142	T T	G G	G G	C C	G G	C T	G G
165	T T	G G	T T	C C	A G	C T	G G
191	T T	G G	G G	C C	G G	C T	A G
209	T T	G G	G G	C C	A G	T T	G G
23	T T	G G	G T	A C	A G	C T	G G
54	T T	G G	G T	C C	A G	C T	A G
83	T T	G G	G T	A C	A G	T T	G G
104	T T	G G	G G	C C	A G	C T	G G
143	T T	G G	G T	A C	G G	C C	G G
167	T T	G G	G T	C C	G G	C T	G G
192	T T	G G	G T	C C	A A	T T	G G
212	T T	G G	G G	C C	G G	C T	A G
24	T T	G G	G G	C C	A G	T T	G G
55	T T	G G	G G	C C	G G	T T	G G
84	T T	G G	G G	C C	A G	T T	G G
107	G T	G G	G G	C C	A G	C T	G G
144	T T	G G	G G	C C	G G	C T	G G
169	T T	G G	G T	A C	A G	T T	G G
193	T T	G G	G T	A C	A A	C T	G G
214	T T	G G	G T	A C	A G	C T	A G
25	T T	G G	G T	C C	G G	C T	G G
56	T T	G G	G T	C C	A G	T T	G G
85	T T	G G	G T	C C	G G	C T	G G
116	T T	G G	G G	C C	G G	T T	G G
146	T T	G G	G G	C C	A G	C T	G G
194	T T	G G	G T	A C	G G	C T	A G
217	T T	G G	G G	C C	G G	T T	G G
219	T T	G G	G T	A C	A G	T T	G G
236	T T	G G	G G	C C	A G	T T	G G
264	T T	G G	G G	C C	G G	C T	G G
283	T T	G G	T T	C C	A A	T T	G G
383	T T	G G	T T	A A	A G	T T	G G
398	T T	G G	G T	C C	A G	C T	A G
423	T T	G G	G T	C C	A G	C T	A G
446	T T	G G	G T	C C	A G	T T	G G
222	T T	G G	G G	C C	G G	C T	A G
237	T T	G G	G T	A C	A A	T T	G G
265	T T	G G	G G	C C	A G	T T	G G
286	T T	G G	G T	C C	A G	T T	G G
385	T T	G G	G G	C C	G G	T T	A G
403	T T	G G	G T	A C	G G	T T	G G
425	T T	G G	G G	C C	A G	C T	A G
449	T T	G G	G G	C C	G G	T T	G G
223	T T	G G	G G	C C	G G	T T	G G
238	T T	G G	G T	A C	A G	C T	G G
266	T T	G G	G G	C C	G G	T T	G G
289	T T	G G	G T	C C	A G	T T	G G
386	T T	G G	G T	A C	A G	C T	A G
404	T T	G G	G T	A C	A G	C T	G G
428	T T	G G	G G	C C	A G	C T	A G
453	T T	G G	G G	C C	G G	C T	G G
225	T T	G G	G T	A C	A G	T T	G G
240	T T	G G	G G	C C	A G	T T	G G
267	T T	G G	G T	A C	G G	T T	G G
290	T T	G G	G T	C C	A G	T T	G G
387	T T	G G	G G	C C	G G	T T	G G
410	T T	G G	T T	A A	A G	T T	G G
430	T T	G G	G T	C C	A G	C T	G G
454	T T	G G	G T	A C	A G	C T	A G
226	T T	G G	G G	C C	A A	T T	G G
241	T T	G G	G T	C C	G G	T T	G G
268	T T	G G	G G	C C	G G	T T	G G
291	T T	G G	G T	A C	A G	C T	G G
388	T T	G G	G T	C C	A G	T T	G G
411	T T	G G	G G	C C	A G	T T	G G
431	T T	G G	T T	A C	G G	T T	G G
455	T T	G G	G T	C C	A G	C T	A G
227	T T	G G	G G	C C	A G	T T	G G
242	T T	G G	G T	C C	G G	T T	G G
269	T T	G G	G G	C C	G G	T T	G G
292	T T	G G	G G	C C	G G	C T	A G
390	T T	G G	G T	C C	A G	T T	G G
412	T T	G G	G G	C C	A G	C T	G G
433	T T	G G	G G	C C	A G	C C	A G
456	T T	G G	G G	C C	G G	T T	A G
228	T T	G G	G G	C C	G G	T T	G G
247	T T	G G	G T	A C	A G	T T	G G
273	T T	G G	G G	C C	A G	C T	G G
293	T T	G G	G T	A C	A G	C T	G G
392	T T	G G	T T	C C	A G	C T	G G
413	T T	G G	G G	C C	G G	T T	G G
436	T T	G G	G G	C C	A G	C T	A G
457	T T	G G	G G	C C	A G	C T	G G
229	T T	G G	G T	C C	A G	T T	G G
251	T T	G G	T T	C C	A A	T T	G G
276	T T	G G	G G	C C	A G	T T	G G
297	T T	G G	G T	C C	A G	C T	A G
393	T T	G G	G G	C C	G G	T T	G G
414	T T	G G	G T	A C	A G	T T	G G
440	T T	G G	G T	A C	A G	C T	A G
458	T T	G G	G T	A C	A G	C T	G G
232	T T	G G	T T	A C	A G	C T	G G
257	T T	G G	G T	A C	G G	T T	G G
278	T T	G G	G G	C C	G G	C T	G G
298	T T	G G	G G	C C	A G	C T	G G
394	T T	G G	G G	C C	G G	T T	G G
415	T T	G G	G T	C C	A G	C C	A G
442	T T	G G	G G	C C	G G	T T	G G
466	T T	G G	G T	A C	A G	C T	A G
233	T T	G G	G G	C C	G G	T T	G G
259	T T	G G	G G	C C	G G	T T	G G
280	T T	G G	G G	C C	A G	T T	G G
303	T T	G G	G G	C C	G G	T T	G G
395	T T	G G	G G	C C	G G	C T	G G
416	T T	G G	G T	C C	A G	C T	A G
443	T T	G G	G G	C C	A G	C C	A G
467	T T	G G	G G	C C	A G	C T	G G
234	G T	G G	G T	C C	A A	C T	G G
261	T T	G G	G G	C C	G G	T T	G G
281	T T	G G	G G	C C	G G	T T	G G
347	T T	G G	G T	A C	A G	T T	G G
396	T T	G G	G T	A C	A G	C T	A G
418	T T	G G	G T	C C	A G	C T	A G
444	T T	G G	G G	C C	A G	C T	G G
470	T T	G G	G G	C C	A G	C C	A G
235	T T	G G	G T	A C	A G	C T	A G
262	T T	G G	G G	C C	G G	T T	G G
282	T T	G G	G G	C C	G G	C T	G G
352	T T	G G	G T	C C	A G	T T	G G
397	T T	G G	G T	A C	A G	C T	A G
420	T T	G G	G G	C C	A G	C T	A G
445	T T	G G	G G	C C	G G	T T	G G
471	T T	G G	G T	C C	A G	T T	G G
472	T T	G G	T T	A C	G G	C T	G G
495	T T	G G	G T	A C	G G	T T	G G
516	T T	G G	G G	C C	G G	T T	G G
536	T T	G G	G G	C C	G G	T T	G G
560	T T	G G	G G	A C	A G	T T	G G
588	T T	G G	G G	C C	G G	T T	G G
619	T T	G G	G G	C C	G G	T T	G G
647	T T	G G	G G	C C	A G	T T	G G
473	T T	G G	G T	A C	A G	T T	G G
498	T T	G G	G G	C C	G G	T T	G G
517	T T	G G	G T	C C	A A	T T	G G
537	T T	G G	G T	C C	A G	T T	G G
561	T T	G G	G G	C C	A G	T T	G G
594	T T	G G	G T	C C	A G	T T	G G
621	T T	G G	G G	C C	G G	T T	G G
648	T T	G G	G G	C C	A G	T T	G G
474	T T	G G	G T	C C	A A	T T	G G
499	T T	G G	T T	A C	A A	T T	A G
521	T T	G G	G G	C C	A G	T T	G G
538	T T	G G	G G	C C	A G	T T	G G
563	T T	G G	G T	C C	A G	T T	G G
597	T T	G G	G T	A C	A A	T T	G G
622	T T	G G	G T	A C	A G	T T	G G
651	T T	G G	G G	C C	A G	T T	G G
475	T T	G G	G G	C C	G G	C T	G G
501	T T	G G	G T	A C	A A	T T	G G
522	T T	G G	G G	C C	A G	T T	G G
543	T T	G G	G G	A C	A G	T T	G G
564	T T	G G	G G	C C	A G	T T	G G
600	T T	G G	G G	C C	G G	T T	G G
624	T T	G G	G T	C C	A A	T T	G G
653	T T	G G	G T	A C	A G	T T	G G
478	T T	G G	G G	C C	G G	T T	G G
502	T T	G G	G G	C C	G G	T T	G G
523	T T	G G	G G	C C	A G	T T	G G
545	T T	G G	G T	C C	A G	T T	G G
565	T T	G G	G G	C C	A G	T T	G G
606	T T	G G	G T	C C	G G	T T	G G
625	T T	G G	G T	A C	G G	T T	G G
654	T T	G G	G G	C C	A G	T T	G G
479	T T	G G	G G	C C	A G	T T	G G
504	T T	G G	G G	C C	G G	T T	G G
525	T T	G G	G G	C C	A G	T T	G G
548	T T	G G	G G	C C	A A	T T	G G
567	T T	G G	G G	C C	G G	T T	G G
607	G T	G G	G T	C C	A G	T T	G G
627	G T	G G	G T	A C	A G	T T	G G
655	T T	G G	G G	C C	A G	C T	G G
480	T T	G G	G G	C C	G G	T T	G G
506	G T	G G	T T	C C	A A	C T	A G
527	T T	G G	G G	C C	G G	T T	G G
549	T T	A G	G G	C C	G G	T T	G G
568	T T	G G	G G	C C	A G	T T	G G
608	T T	G G	G G	C C	A G	T T	G G
638	T T	G G	G T	A C	G G	C T	A G
659	T T	G G	G G	C C	A G	C T	G G
484	T T	G G	G T	C C	A G	C T	A G
509	T T	G G	G G	C C	G G	T T	G G
528	T T	G G	G T	A C	A G	C T	A A
552	T T	G G	G G	C C	G G	T T	G G
570	T T	G G	G T	C C	A G	T T	G G
611	T T	G G	G T	C C	A G	T T	G G
639	T T	G G	G T	A C	G G	T T	G G
660	T T	G G	G T	A C	A G	T T	G G
487	T T	G G	G T	C C	A G	T T	G G
510	T T	G G	G T	A C	G G	T T	G G
529	T T	G G	G T	C C	A G	C T	A G
553	T T	G G	G T	A C	A G	C T	G G
572	T T	G G	G G	C C	A G	C T	G G
612	T T	G G	G T	A C	A G	T T	G G
641	T T	G G	G T	A C	A G	T T	G G
663	T T	G G	G T	C C	G G	C T	G G
488	T T	G G	G G	C C	G G	T T	G G
511	T T	G G	G G	C C	A G	C T	G G
530	T T	G G	G T	A C	G G	T T	G G
554	T T	G G	G T	C C	A G	T T	G G
573	T T	G G	G T	C C	G G	T T	G G
613	T T	G G	G T	A C	A G	T T	G G
642	T T	G G	G G	C C	G G	T T	G G
664	T T	G G	G T	A C	A G	T T	G G
489	T T	G G	G G	C C	G G	T T	G G
512	T T	G G	G T	C C	G G	T T	G G
533	T T	G G	G G	C C	G G	C T	G G
557	T T	G G	G G	C C	G G	C T	G G
579	T T	G G	G G	C C	G G	T T	G G
615	G T	G G	G T	C C	A G	T T	G G
643	T T	G G	G G	C C	G G	C T	A G
665	T T	G G	G G	C C	G G	T T	G G
491	T T	G G	G T	C C	G G	T T	G G
513	T T	G G	G T	C C	A G	T T	G G
534	T T	G G	G G	C C	A A	T T	G G
558	T T	G G	G G	C C	G G	T T	G G
583	T T	G G	G G	C C	G G	T T	G G
618	T T	G G	G T	A C	A G	T T	G G
644	T T	G G	G G	C C	A G	T T	G G
667	T T	G G	G T	C C	A G	T T	G G
668	T T	G G	G G	C C	G G	T T	G G
686	T T	G G	G T	C C	G G	T T	G G
746	T T	G G	T T	C C	A A	T T	G G
804	T T	G G	G T	A C	A G	T T	G G
822	G G	A G	G T	C C	A G	C T	A G
839	T T	G G	G G	C C	A G	T T	G G
1	G T	A G	G G	C C	G G	T T	G G
36	T T	G G	T T	A A	G G	T T	G G
669	T T	G G	T T	C C	G G	C T	G G
688	T T	G G	G T	C C	A A	T T	G G
751	T T	G G	G G	C C	A G	C C	A G
805	T T	G G	G G	C C	G G	T T	G G
824	T T	G G	G T	C C	A G	C T	G G
843	T T	G G	G T	C C	A G	T T	G G
3	T T	G G	G T	A C	A G	T T	G G
42	T T	G G	G G	C C	G G	T T	G G
671	T T	G G	G T	C C	G G	C T	G G
699	T T	G G	G T	C C	A G	T T	G G
754	T T	G G	G T	C C	A G	T T	G G
807	T T	G G	G T	A C	A G	C T	A G
826	T T	G G	G T	A C	A G	C T	G G
847	T T	G G	G T	C C	A G	T T	G G
5	T T	G G	G G	C C	A G	T T	G G
43	T T	G G	G G	C C	A G	T T	G G
675	T T	G G	G G	C C	A G	T T	G G
700	T T	G G	G G	C C	A G	T T	G G
755	T T	G G	T T	A C	A A	T T	G G
808	T T	G G	G T	C C	A G	T T	G G
827	T T	G G	G G	C C	G G	T T	G G
849	T T	G G	G G	C C	A A	T T	G G
6	T T	G G	G G	C C	A G	C T	G G
49	T T	G G	G T	C C	G G	C T	G G
678	T T	G G	G G	C C	A G	T T	G G
701	T T	G G	G G	C C	G G	T T	G G
758	T T	G G	G G	C C	A G	C T	G G
810	T T	G G	G T	A C	A G	T T	G G
828	T T	G G	G G	C C	G G	C C	A A
850	T T	G G	G G	C C	G G	T T	G G
9	T T	G G	G G	C C	A G	T T	G G
50	T T	G G	G G	C C	G G	T T	G G
679	T T	G G	G G	C C	G G	T T	G G
703	T T	G G	G G	C C	G G	T T	G G
762	T T	G G	T T	A C	A A	T T	G G
811	G T	G G	G G	A A	G G	T T	G G
829	T T	G G	G G	C C	G G	T T	G G
852	T T	G G	G T	A C	A G	T T	G G
10	T T	G G	G T	C C	A G	T T	G G
680	T T	G G	G G	C C	G G	T T	G G
707	T T	G G	T T	A C	A G	T T	G G
764	T T	G G	G G	C C	A G	T T	G G
812	T T	G G	G G	C C	G G	C T	G G
832	T T	G G	G T	A C	A G	T T	G G
853	T T	G G	G T	A C	A G	T T	G G
11	T T	G G	G G	C C	G G	C T	G G
63	T T	G G	G G	C C	A G	C T	G G
681	T T	G G	G G	C C	G G	T T	G G
709	T T	G G	G T	A C	A G	C T	G G
769	T T	G G	G T	A C	A G	T T	G G
813	T T	G G	G G	C C	G G	T T	G G
833	T T	G G	T T	A A	A A	T T	G G
854	T T	G G	G T	A C	A A	C T	G G
15	T T	G G	G T	C C	G G	T T	G G
66	T T	G G	G G	C C	G G	C T	G G
682	T T	G G	G G	C C	G G	T T	G G
712	T T	G G	G T	C C	G G	T T	G G
770	T T	G G	G T	A C	G G	T T	G G
816	T T	G G	G G	C C	G G	T T	G G
834	T T	G G	G T	C C	A G	T T	G G
855	T T	G G	G G	C C	G G	C T	A G
16	T T	G G	G G	C C	G G	T T	G G
70	T T	G G	G T	A C	G G	T T	G G
683	T T	G G	G G	C C	A G	C C	G G
729	T T	G G	G T	A C	A G	T T	G G
772	T T	G G	G G	C C	G G	T T	G G
818	T T	G G	G T	A C	A G	T T	G G
835	T T	G G	G G	C C	G G	C T	A G
857	T T	G G	G G	C C	G G	C T	A G
33	T T	G G	G G	C C	G G	T T	G G
72	T T	G G	G T	C C	A G	T T	G G
684	T T	G G	T T	A A	A A	T T	G G
739	T T	G G	G G	C C	A G	T T	G G
801	T T	G G	G G	C C	G G	T T	G G
819	T T	G G	G T	A C	G G	C T	A G
837	T T	G G	G G	C C	A G	T T	G G
858	T T	G G	G T	A C	G G	C T	A G
34	T T	G G	G T	C C	G G	C T	A G
75	T T	G G	G T	A C	A G	C T	A G
685	T T	G G	G G	C C	G G	T T	G G
740	G T	A G	T T	A C	A A	T T	G G
802	T T	G G	T T	C C	A G	T T	G G
820	T T	G G	G T	C C	A G	T T	G G
838	T T	G G	G T	A C	A G	C T	G G
859	T T	G G	T T	A A	A A	T T	G G
35	T T	G G	G G	C C	A G	T T	G G
76	T T	G G	G G	C C	G G	T T	G G
77	T T	G G	G G	C C	A G	C T	G G
185	T T	G G	G G	C C	G G	T T	G G
614	T T	G G	T T	A A	G G	T T	G G
672	T T	G G	G G	C C	G G	T T	G G
97	T T	G G	G T	C C	G G	T T	G G
250	T T	G G	G T	C C	A G	T T	G G
78	T T	G G	T T	A C	A G	T T	G G
195	T T	G G	G G	C C	G G	C T	G G
623	T T	G G	G T	C C	A G	C C	G G
673	T T	G G	G T	A C	A G	C T	A G
101	G T	G G	G T	C C	A G	T T	G G
258	T T	G G	G T	A C	G G	T T	G G
79	T T	G G	G G	C C	A G	C T	G G
200	T T	G G	G G	C C	A G	T T	G G
628	G T	G G	G T	A C	A G	C T	G G
676	T T	G G	G T	A C	A G	T T	G G
110	T T	G G	T T	C C	G G	T T	G G
260	T T	G G	T T	C C	A A	C T	G G
80	G T	A G	G T	C C	A A	T T	G G
205	T T	G G	G G	C C	G G	T T	G G
629	T T	G G	G G	C C	G G	T T	G G
677	T T	G G	G T	C C	G G	T T	G G
115	T T	G G	G G	C C	G G	T T	G G
301	T T	G G	G T	A C	A G	T T	G G
81	T T	G G	G T	C C	A A	C T	G G
576	T T	G G	G G	C C	A G	T T	G G
630	T T	G G	G T	C C	A G	T T	G G
689	T T	G G	G T	C C	A G	T T	G G
118	G T	G G	T T	A C	A A	T T	G G
625	T T	G G	G T	C C	A G	C T	G G
157	T T	G G	G G	C C	G G	T T	G G
577	T T	G G	G G	C C	G G	T T	G G
633	T T	G G	G G	C C	G G	C T	A G
29	T T	G G	T T	A C	A G	T T	G G
129	T T	G G	G T	A C	A G	C T	G G
313	G T	G G	G G	C C	G G	C T	G G
161	T T	G G	G G	C C	A G	T T	G G
578	T T	G G	G G	C C	A A	C T	G G
637	T T	G G	G T	C C	G G	T T	G G
30	T T	G G	T T	A C	A G	T T	G G
201	T T	G G	G G	C C	G G	C C	A A
162	T T	G G	G T	C C	A G	T T	G G
580	T T	G G	G G	C C	A G	T T	G G
645	T T	G G	G G	C C	A G	T T	G G
37	T T	G G	G G	C C	G G	T T	G G
202	T T	G G	G T	C C	A G	T T	G G
168	G T	G G	G T	A C	A G	T T	G G
584	T T	G G	G G	C C	G G	T T	G G
652	T T	G G	G G	C C	G G	C C	A G
74	T T	G G	G G	C C	G G	C C	A A
243	T T	G G	T T	A A	G G	T T	G G
173	T T	G G	G G	C C	G G	C T	G G
585	T T	G G	G G	C C	G G	T T	G G
657	T T	G G	G G	C C	A G	T T	G G
87	G T	G G	G G	C C	G G	C T	A G
244	T T	G G	T T	A C	A G	C C	G G
174	T T	G G	G G	C C	G G	T T	G G
605	T T	G G	G G	C C	G G	C T	A G
658	T T	G G	G T	C C	G G	C T	G G
90	G T	G G	G G	C C	G G	T T	G G
245	T T	G G	T T	A C	A G	T T	G G
176	T T	G G	G T	A C	A G	C T	G G
609	T T	G G	G T	A C	G G	T T	G G
670	G T	A G	T T	A A	A A	C T	G G
93	T T	G G	T T	C C	A A	T T	G G
249	T T	G G	T T	A C	A G	T T	G G
